# Supplementary material for: The synthesis of [18F]pitavastatin as a tracer for hOATP using the Suzuki coupling
Source: Royal Society of Chemistry journal article supplement (doi:10.1039/c4ob01953a), 2014-11-19

## Electronic Supplementary Information

### Synthesis of [ $^{18}\text{F}$ ]pitavastatin using a Suzuki Reaction and its application in positron emission tomography imaging

Yusuke Yagi <sup>#a</sup>, Hiroyuki Kimura <sup>#\*a, b</sup>, Kenji Arimitsu <sup>a, c</sup>, Masahiro Ono <sup>a</sup>, Kazuya Maeda <sup>d</sup>, Hiroyuki Kusuhara <sup>d</sup>, Tetsuya Kajimoto <sup>e</sup>, Yuichi Sugiyama <sup>d, f</sup> and Hideo Saji <sup>\*a</sup>

a) Department of Patho-Functional Bioanalysis, Graduate School of Pharmaceutical Sciences, Kyoto University; 46-29 Yoshida Shimoadachi-cho, Sakyo-ku, Kyoto 606-8501, Japan

E-mail: [hsaji@pharm.kyoto-u.ac.jp](mailto:hsaji@pharm.kyoto-u.ac.jp); Tel: +81-75-753-4556, Fax: +81-75-753-4568

b) Radioisotope Research Center of Kyoto University, Yoshida Konoe-cho, Sakyo-ku, Kyoto 606-8501, Japan

c) School of Pharmaceutical Sciences, Mukogawa Women's University, 11-68 Koshien Kyubancho, Nishinomiya, Hyogo 663-8179, Japan

d) Laboratory of Molecular Pharmacokinetics, Graduate School of Pharmaceutical Sciences, The University of Tokyo; 7-3-1 Hongo, Bunkyo-ku, Tokyo 113-0033, Japan

e) Research Organization of Science and Technology, Reserch Center for Drug Discovery and Pharmaceutical Development Science, Ritsumeikan University, 1-1-1, Noji-higashi, Kusatsu, Shiga 525-8577, Japan

f) Sugiyama Laboratory, RIKEN Innovation Center, RIKEN Research Cluster for Innovation, RIKEN, 1-7-22 Suehiro-cho, Tsurumi-ku, Yokohama, Kanagawa, 230-0045, Japan

#### Content

1.  $^1\text{H}$ , and  $^{13}\text{C}$  NMR spectra

S2

Compound 7

\\10.242.96.55\< 冪-Lff[] [f^ (nmr400) \data\byotai\yagi\pitavastatin\Pitavastatin-NH2-CO2Me-1.als

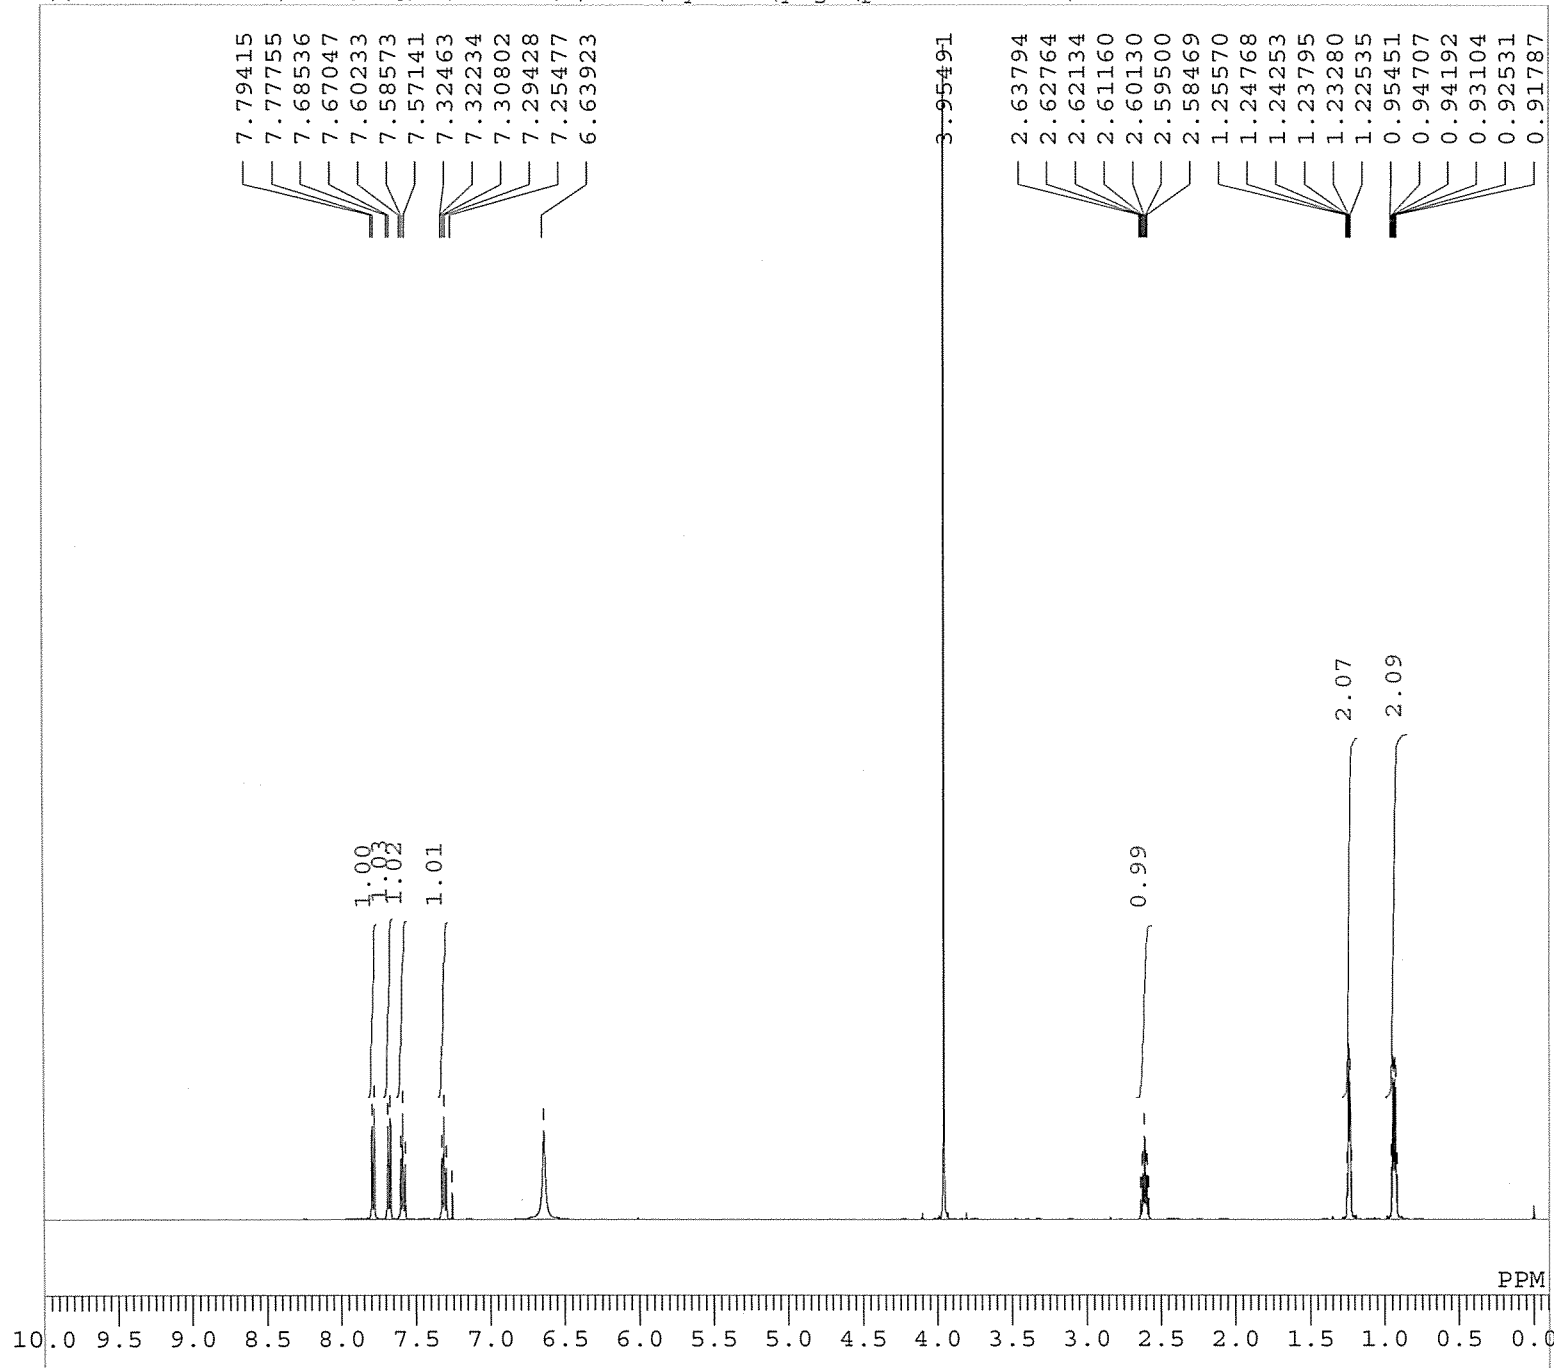

DFILE Pitavastatin-NH2-CO2Me-1.  
 COMNT single\_pulse  
 DATIM 2013-04-19 21:17:45  
 OBNUC 1H  
 EXMOD single\_pulse.ex2  
 OBFRQ 500.16 MHz  
 OBSET 2.41 KHz  
 OBFIN 6.01 Hz  
 POINT 26214  
 FREQU 7507.39 Hz  
 SCANS 16  
 ACQTM 1.7459 sec  
 PD 5.0000 sec  
 PW1 6.50 usec  
 IRNUC 1H  
 CTEMP 402.0 c  
 SLVNT CDCL3  
 EXREF 0.00 ppm  
 BF 0.12 Hz  
 RGAIN 34

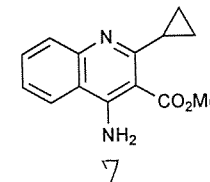

Compound 7

\\10.242.96.55\<#-Lfll[f^(nmr400)\data\byotai\yagi\pitavastatin\Pitavastatin-NH2-CO2Me-C13-1.als

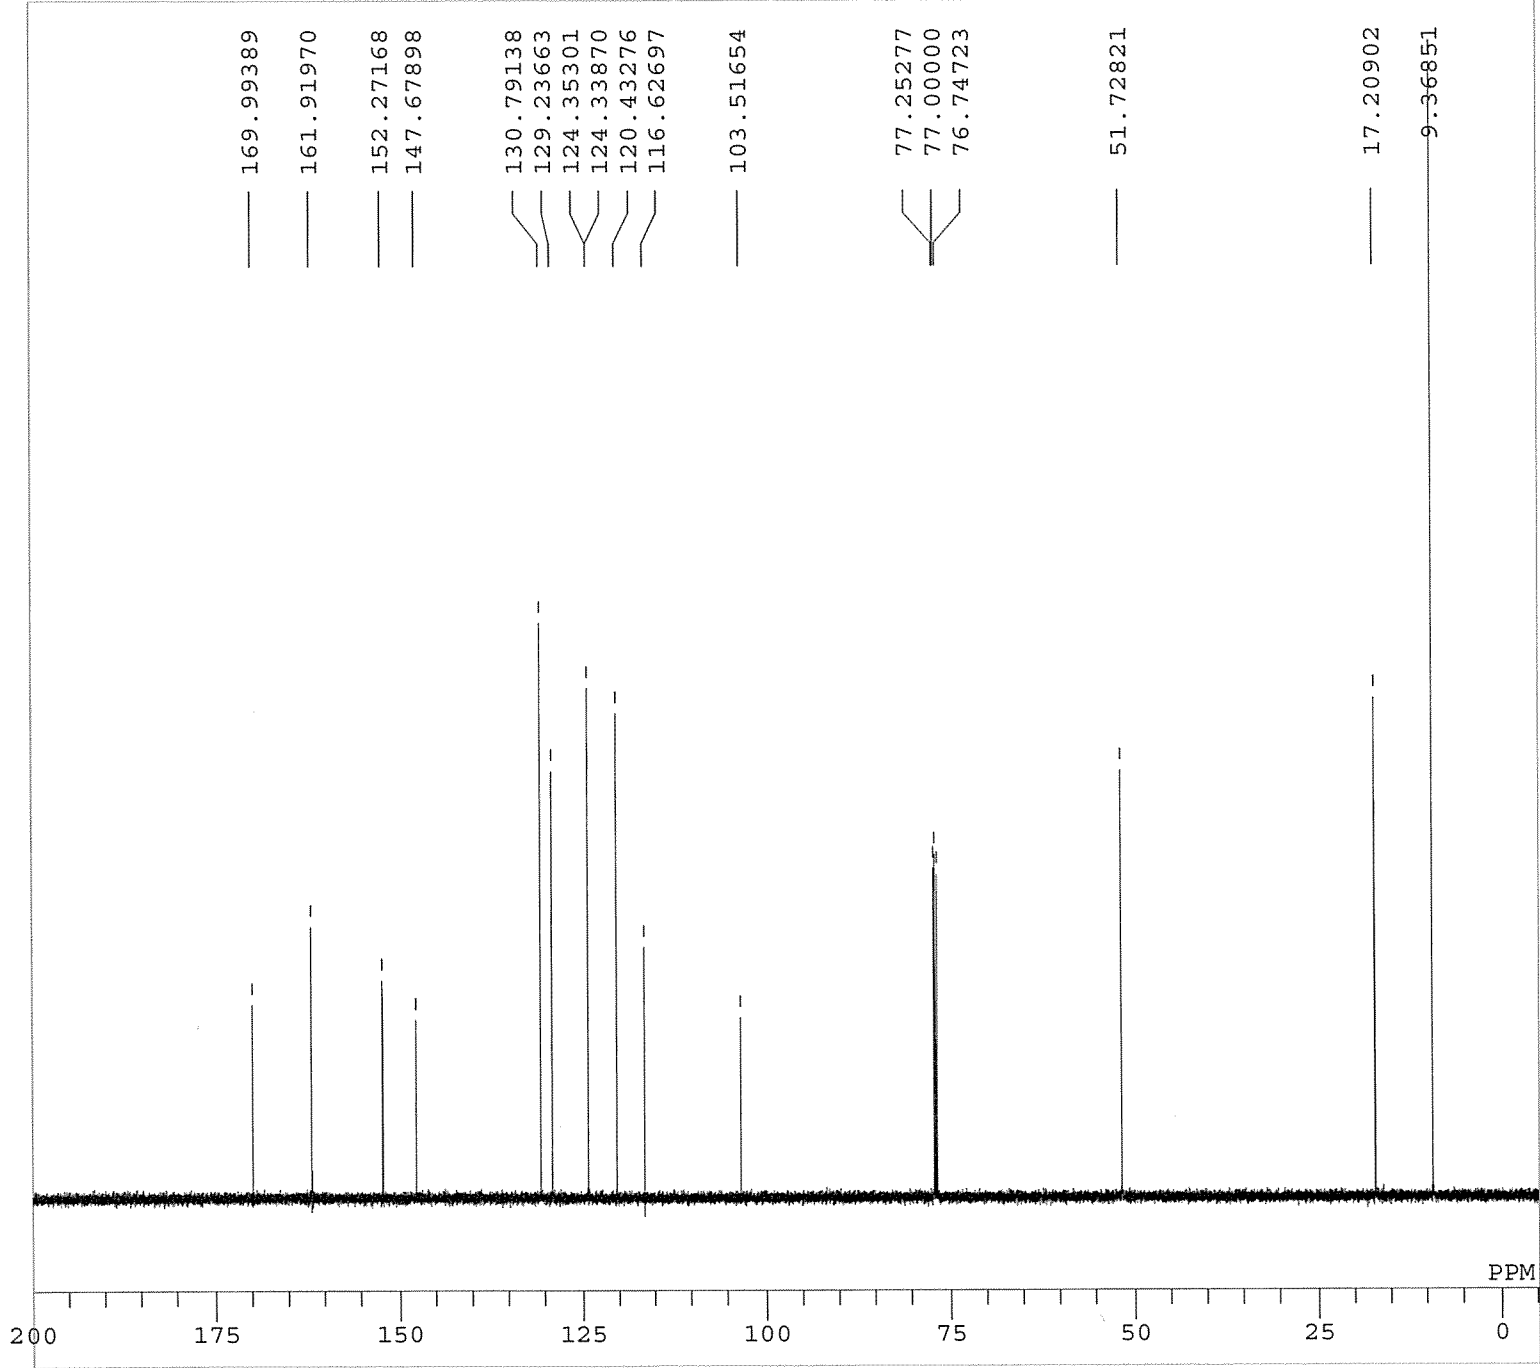

DFILE Pitavastatin-NH2-CO2Me-C1  
COMNT single pulse decoupled ga  
DATIM 2013-04-19 21:25:42  
OBNUC 13C  
EXMOD single\_pulse\_dec  
OBFRQ 125.77 MHz  
OBSET 7.87 KHz  
OBFIN 4.21 Hz  
POINT 52428  
FREQU 31446.06 Hz  
SCANS 153  
ACQTM 0.8336 sec  
PD 2.0000 sec  
PW1 3.73 usec  
IRNUC 1H  
CTEMP 402.4 c  
SLVNT CDCL3  
EXREF 77.00 ppm  
BF 0.12 Hz  
RGAIN 54

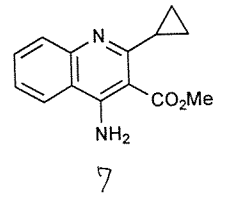

\\10.242.96.55\<µ-Lff[f^(nmr400)\data\byotai\yagi\pitavastatin\Pitavastatin-Br-CO2Me-2.als

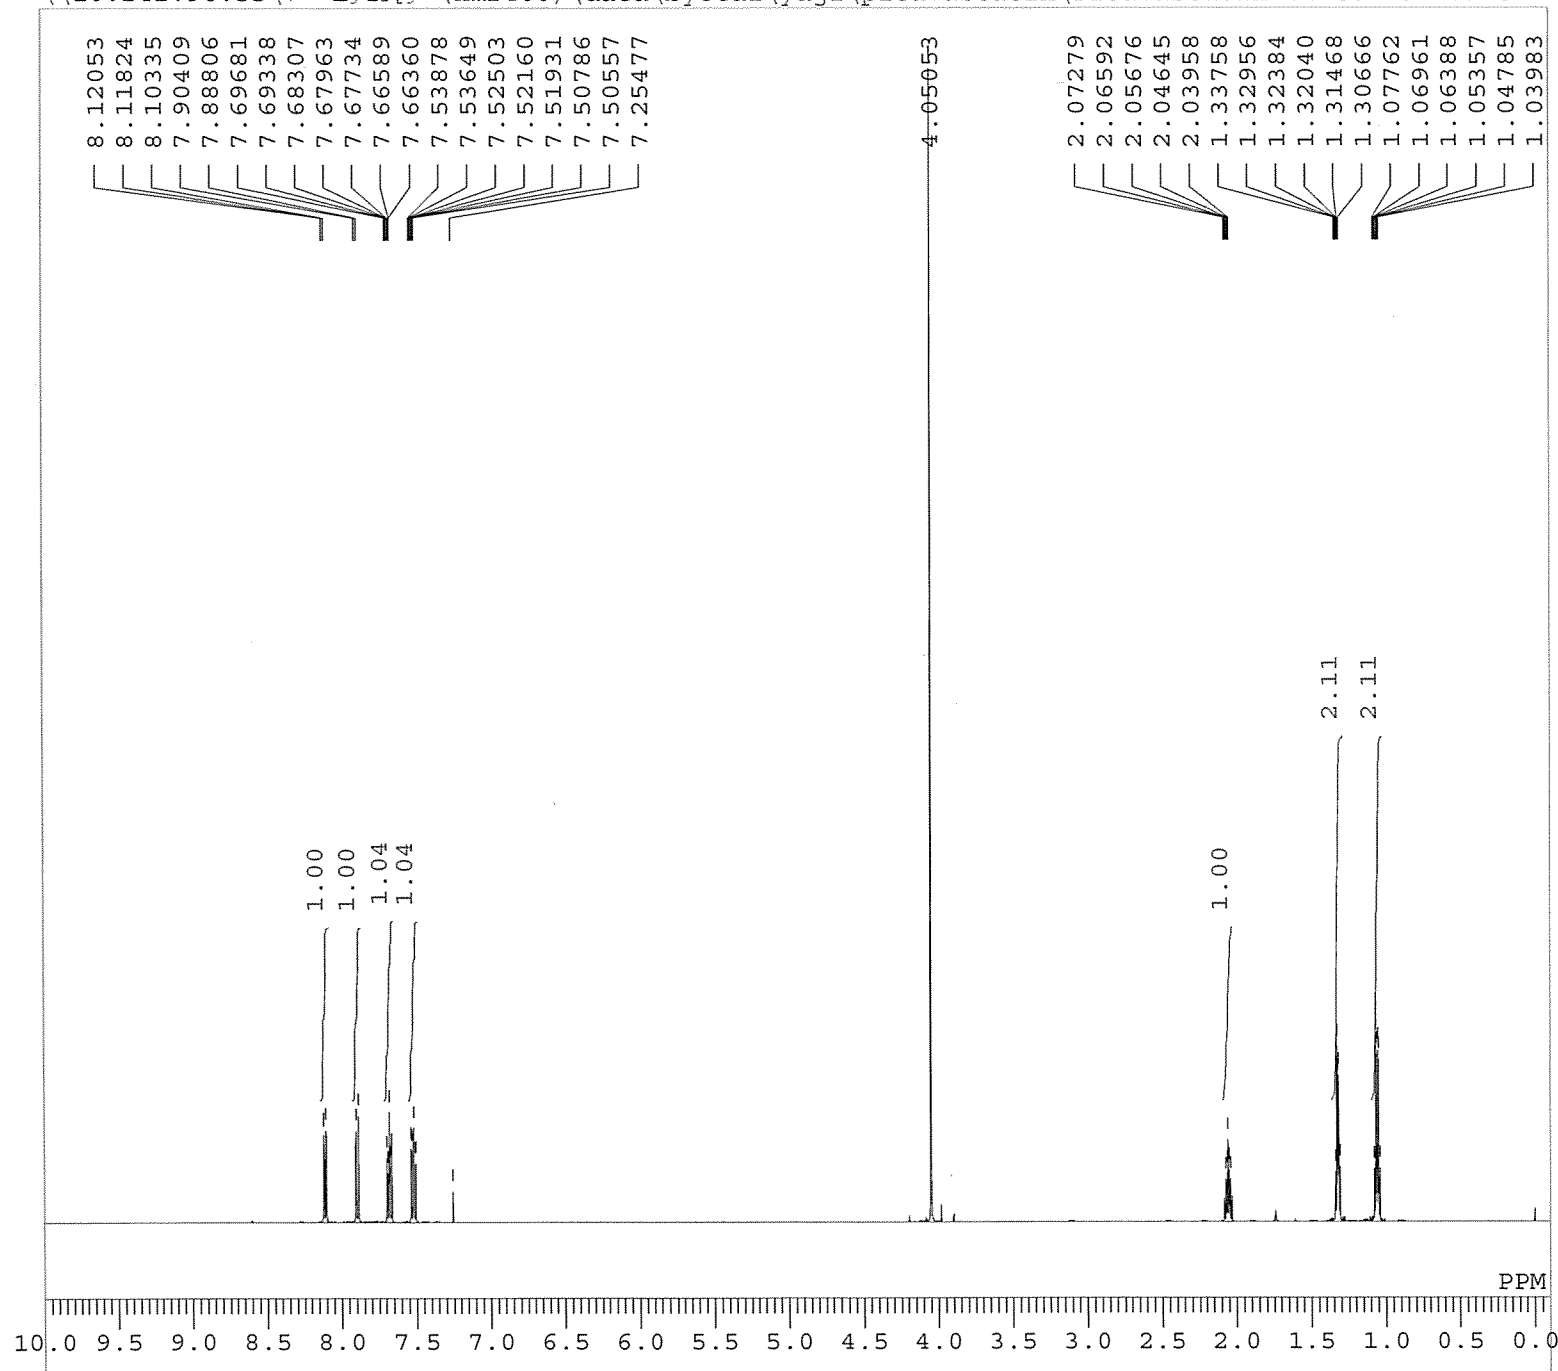

DFILE Pitavastatin-Br-CO2Me-2.a  
 COMNT single\_pulse  
 DATIM 2013-04-10 22:11:46  
 OBNUC 1H  
 EXMOD single\_pulse.ex2  
 OBFREQ 500.16 MHz  
 OBSET 2.41 KHz  
 OBFIN 6.01 Hz  
 POINT 16384  
 FREQU 9384.38 Hz  
 SCANS 16  
 ACQTM 1.7459 sec  
 PD 5.0000 sec  
 PW1 6.50 usec  
 IRNUC 1H  
 CTEMP 26.3 c  
 SLVNT CDCL3  
 EXREF 0.00 ppm  
 BF 0.12 Hz  
 RGAIN 34

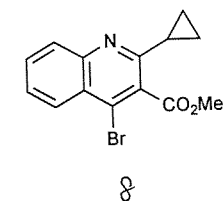

Compound 8

\\10.242.96.55\<#-Lf\ [f^ (nmr400)\data\byotai\yagi\pitavastatin\Pitavastatin-Br-CO2Me-C13-2.als

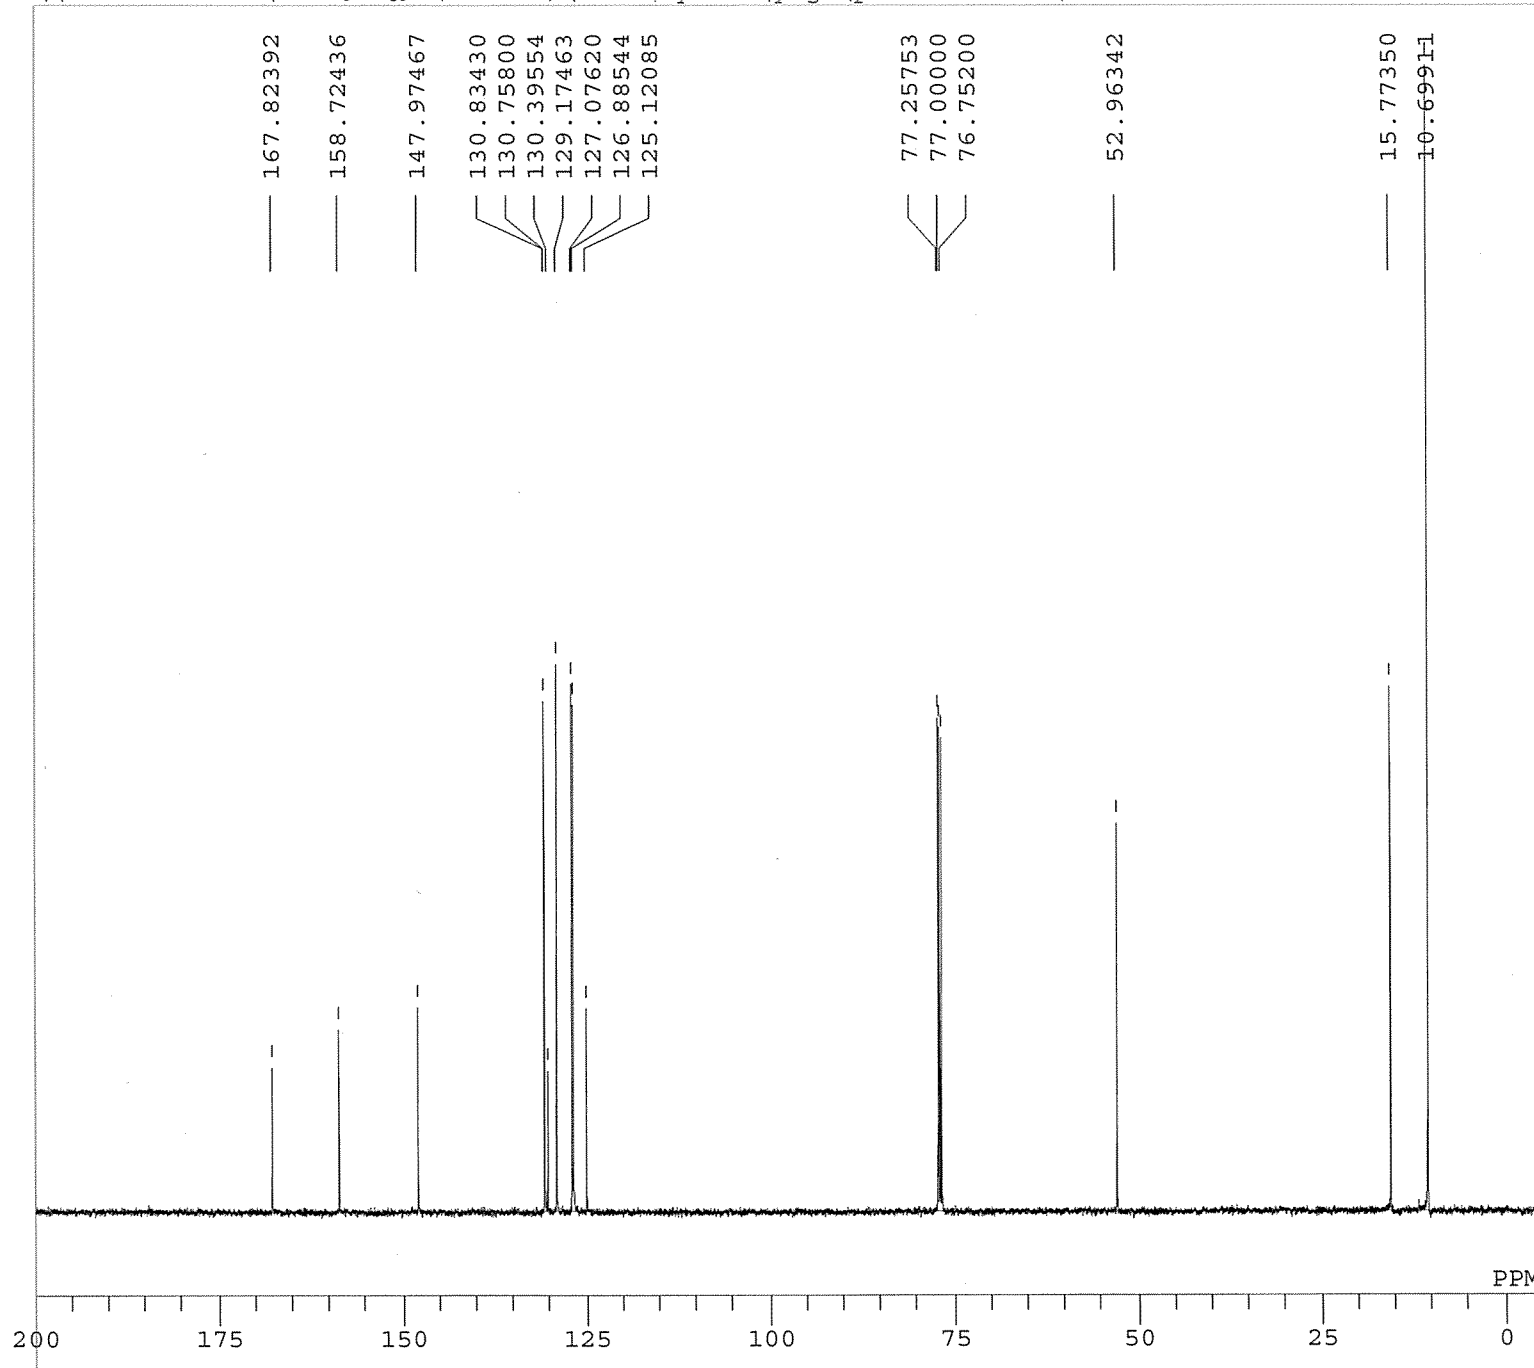

DFILE Pitavastatin-Br-CO2Me-C13  
 COMNT single pulse decoupled ga  
 DATIM 2013-04-10 22:31:16  
 OBNUC 13C  
 EXMOD single\_pulse\_dec  
 OBFRQ 125.77 MHz  
 OBSET 7.87 KHz  
 OBFIN 4.21 Hz  
 POINT 32768  
 FREQU 39308.18 Hz  
 SCANS 400  
 ACQTM 0.8336 sec  
 PD 2.0000 sec  
 PW1 3.73 usec  
 IRNUC 1H  
 CTEMP 26.6 c  
 SLVNT CDCL3  
 EXREF 77.00 ppm  
 BF 0.12 Hz  
 RGAIN 54

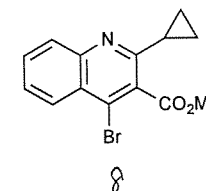

Compound 8a

\\10.242.96.55\< □-Lff[f^(nmr400)\data\byotai\yagi\pitavastatin\Pitavastatin-Br-CH2OH-1.als

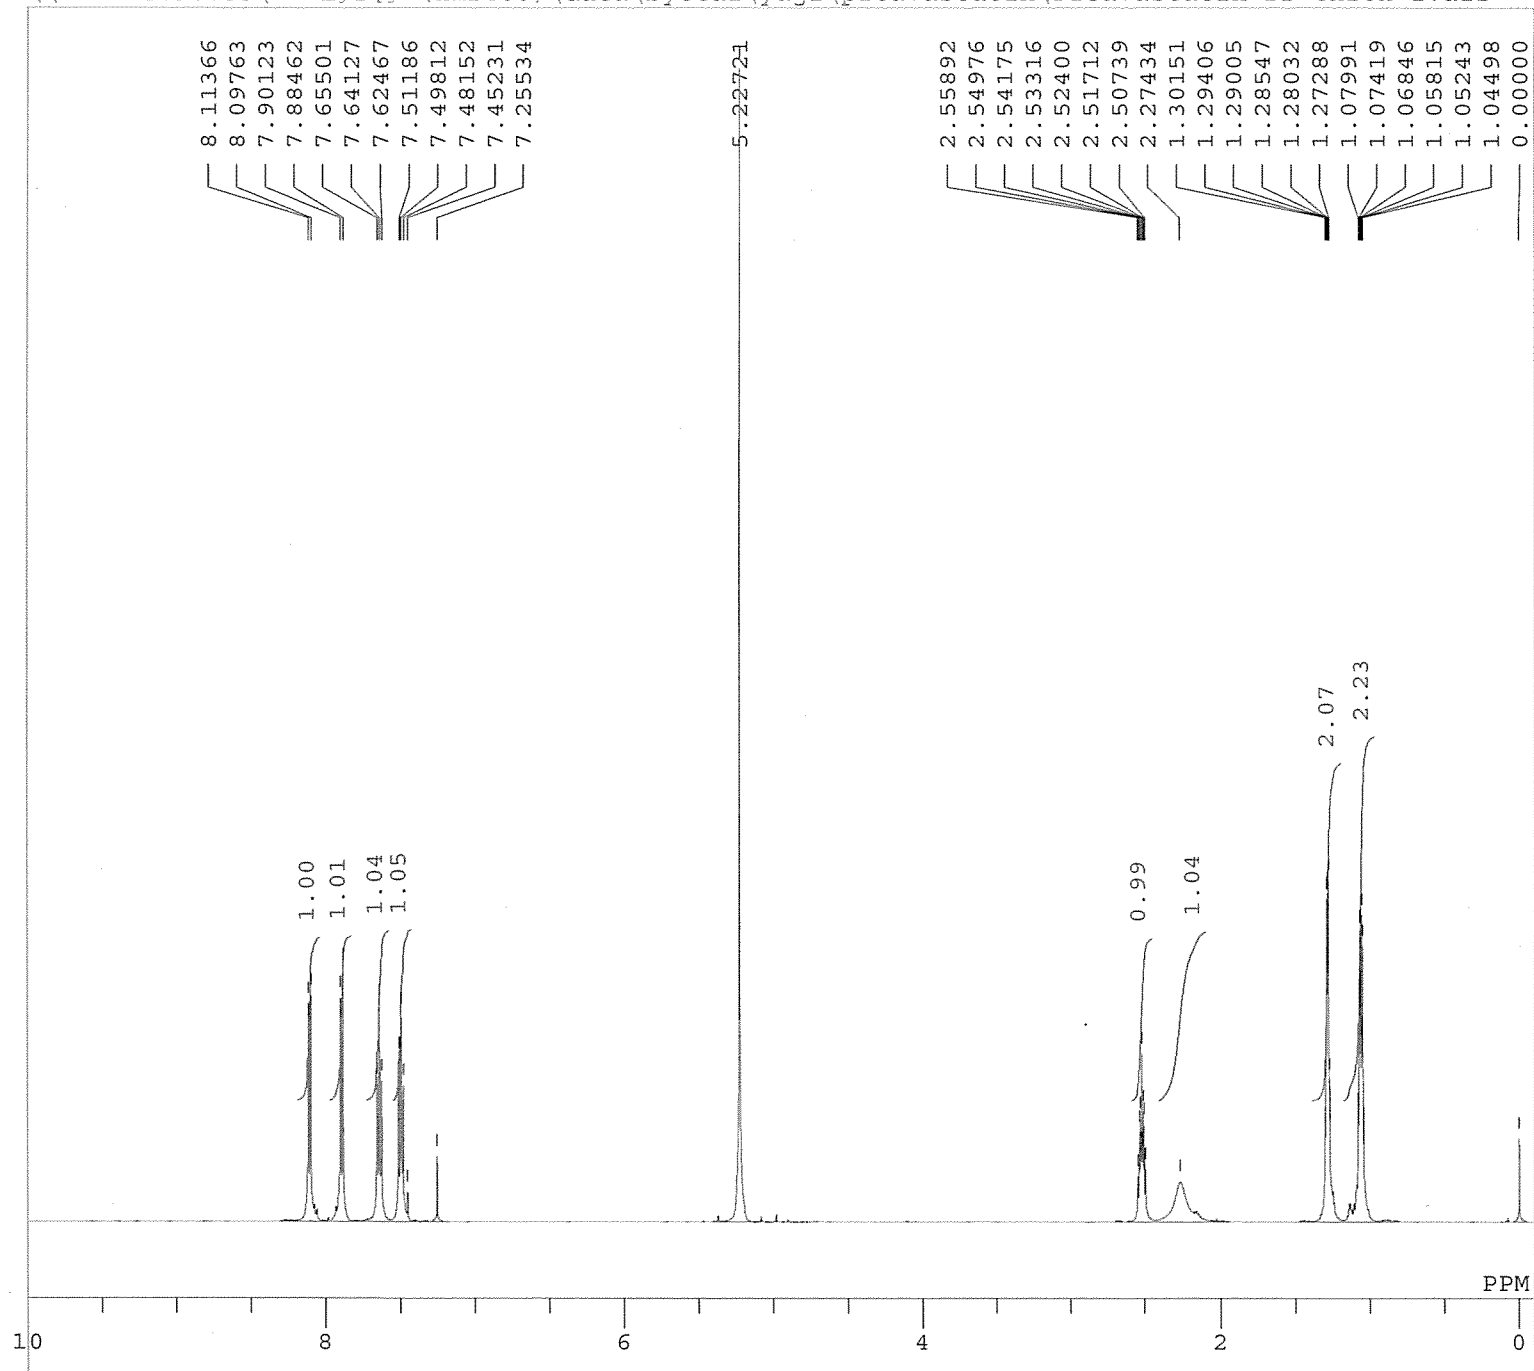

DFILE Pitavastatin-Br-CH2OH-1.a  
 COMNT single\_pulse  
 DATIM 2014-07-22 15:23:45  
 OBNUC 1H  
 EXMOD single\_pulse.ex2  
 OBFRQ 500.16 MHz  
 OBSET 2.41 KHz  
 OBFIN 6.01 Hz  
 POINT 26214  
 FREQU 7507.39 Hz  
 SCANS 16  
 ACQTM 1.7459 sec  
 PD 5.0000 sec  
 PW1 6.82 usec  
 IRNUC 1H  
 CTEMP 23.3 c  
 SLVNT CDCL3  
 EXREF 0.00 ppm  
 BF 0.12 Hz  
 RGAIN 40

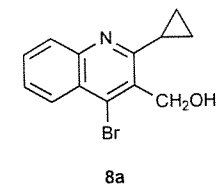

Compound 8a

\\10.242.96.55\< 卣-Lff[f^(nmr400)\data\byotai\yagi\pitavastatin\Pitavastatin-Br-CHO-C13-1.als

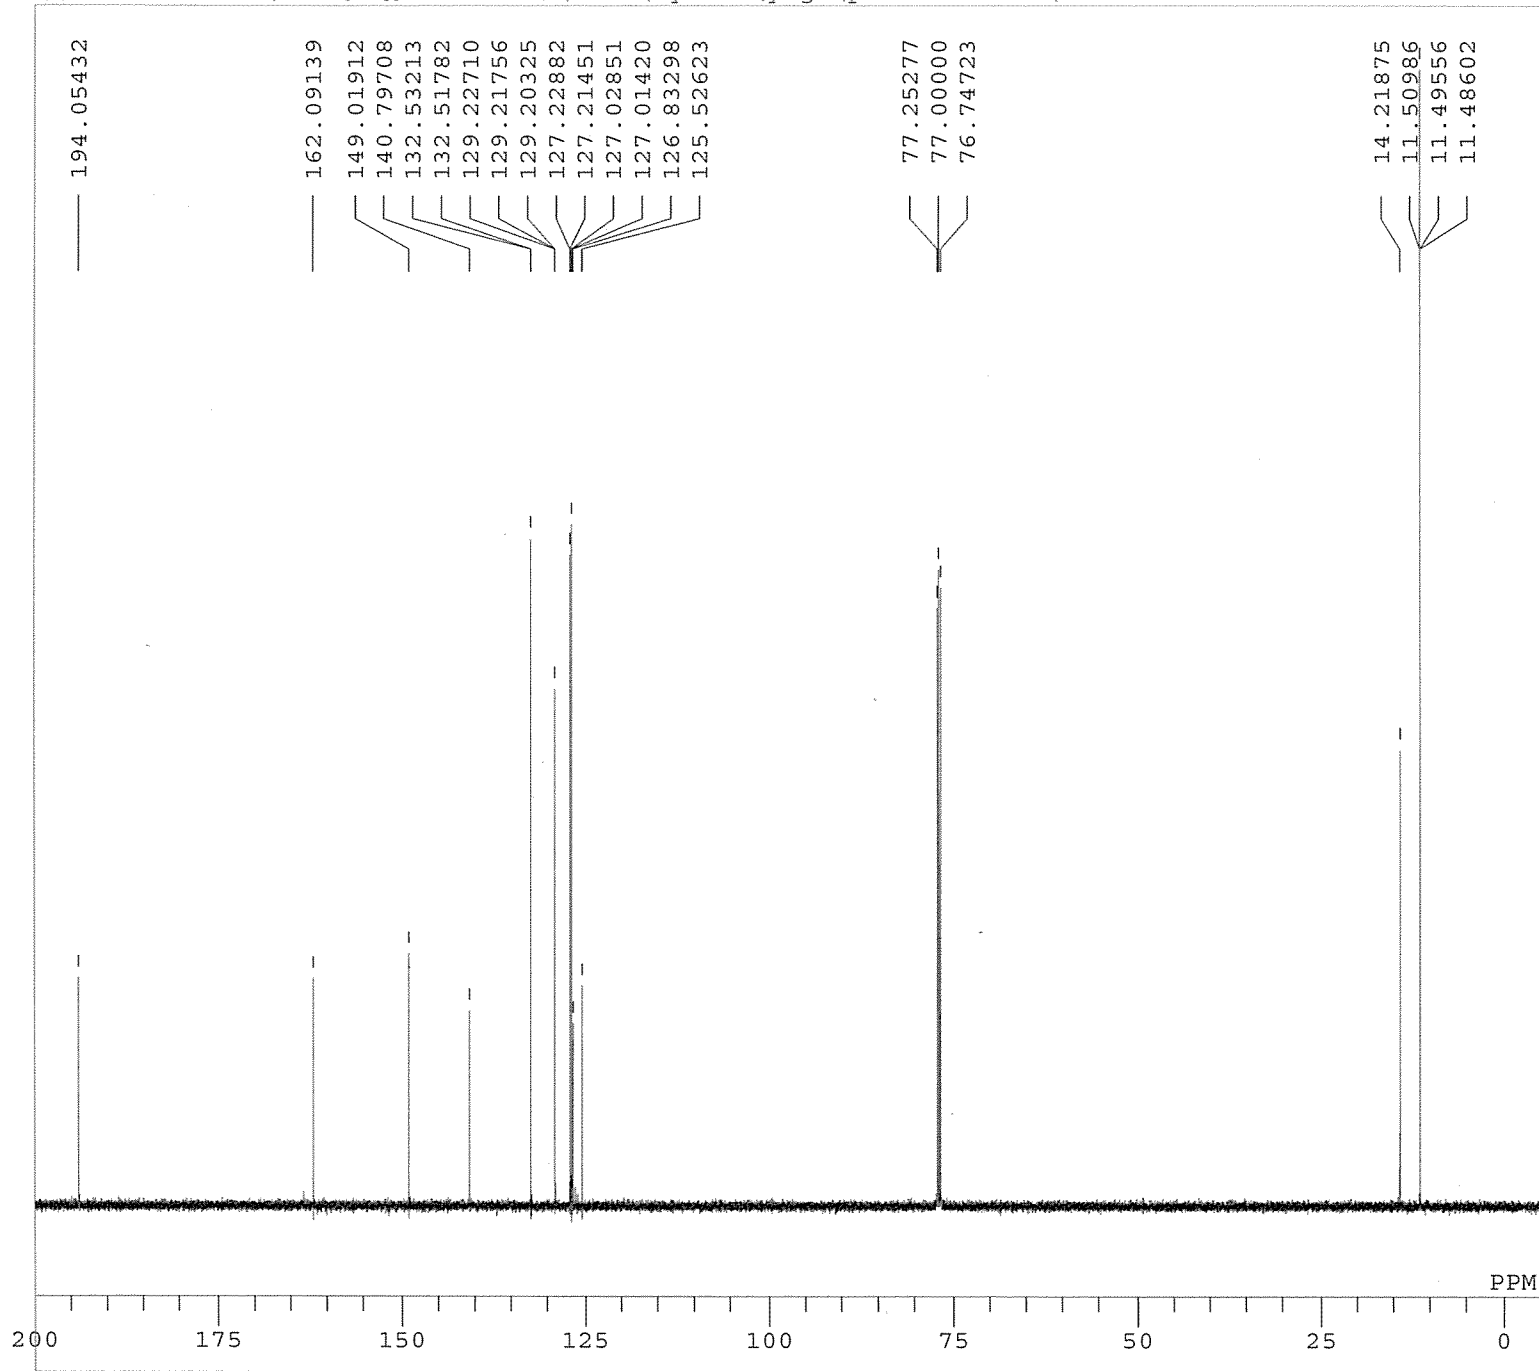

DFILE Pitavastatin-Br-CHO-C13-1  
COMNT single pulse decoupled ga  
DATIM 2013-04-16 15:53:43  
OBNUC 13C  
EXMOD single\_pulse\_dec  
OBFRQ 125.77 MHz  
OBSET 7.87 KHz  
OBFIN 4.21 Hz  
POINT 52428  
FREQU 31446.06 Hz  
SCANS 640  
ACQTM 0.8336 sec  
PD 2.0000 sec  
PW1 3.73 usec  
IRNUC 1H  
CTEMP 25.8 c  
SLVNT CDCL3  
EXREF 77.00 ppm  
BF 0.12 Hz  
RGAIN 54

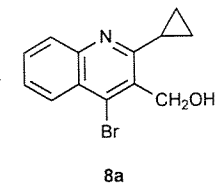

Compound 4

\\10.242.96.55\< 卐-Lffll[f^(nmr400)\data\byotai\yagi\pitavastatin\Pitavastatin-Br-CHO-1.als

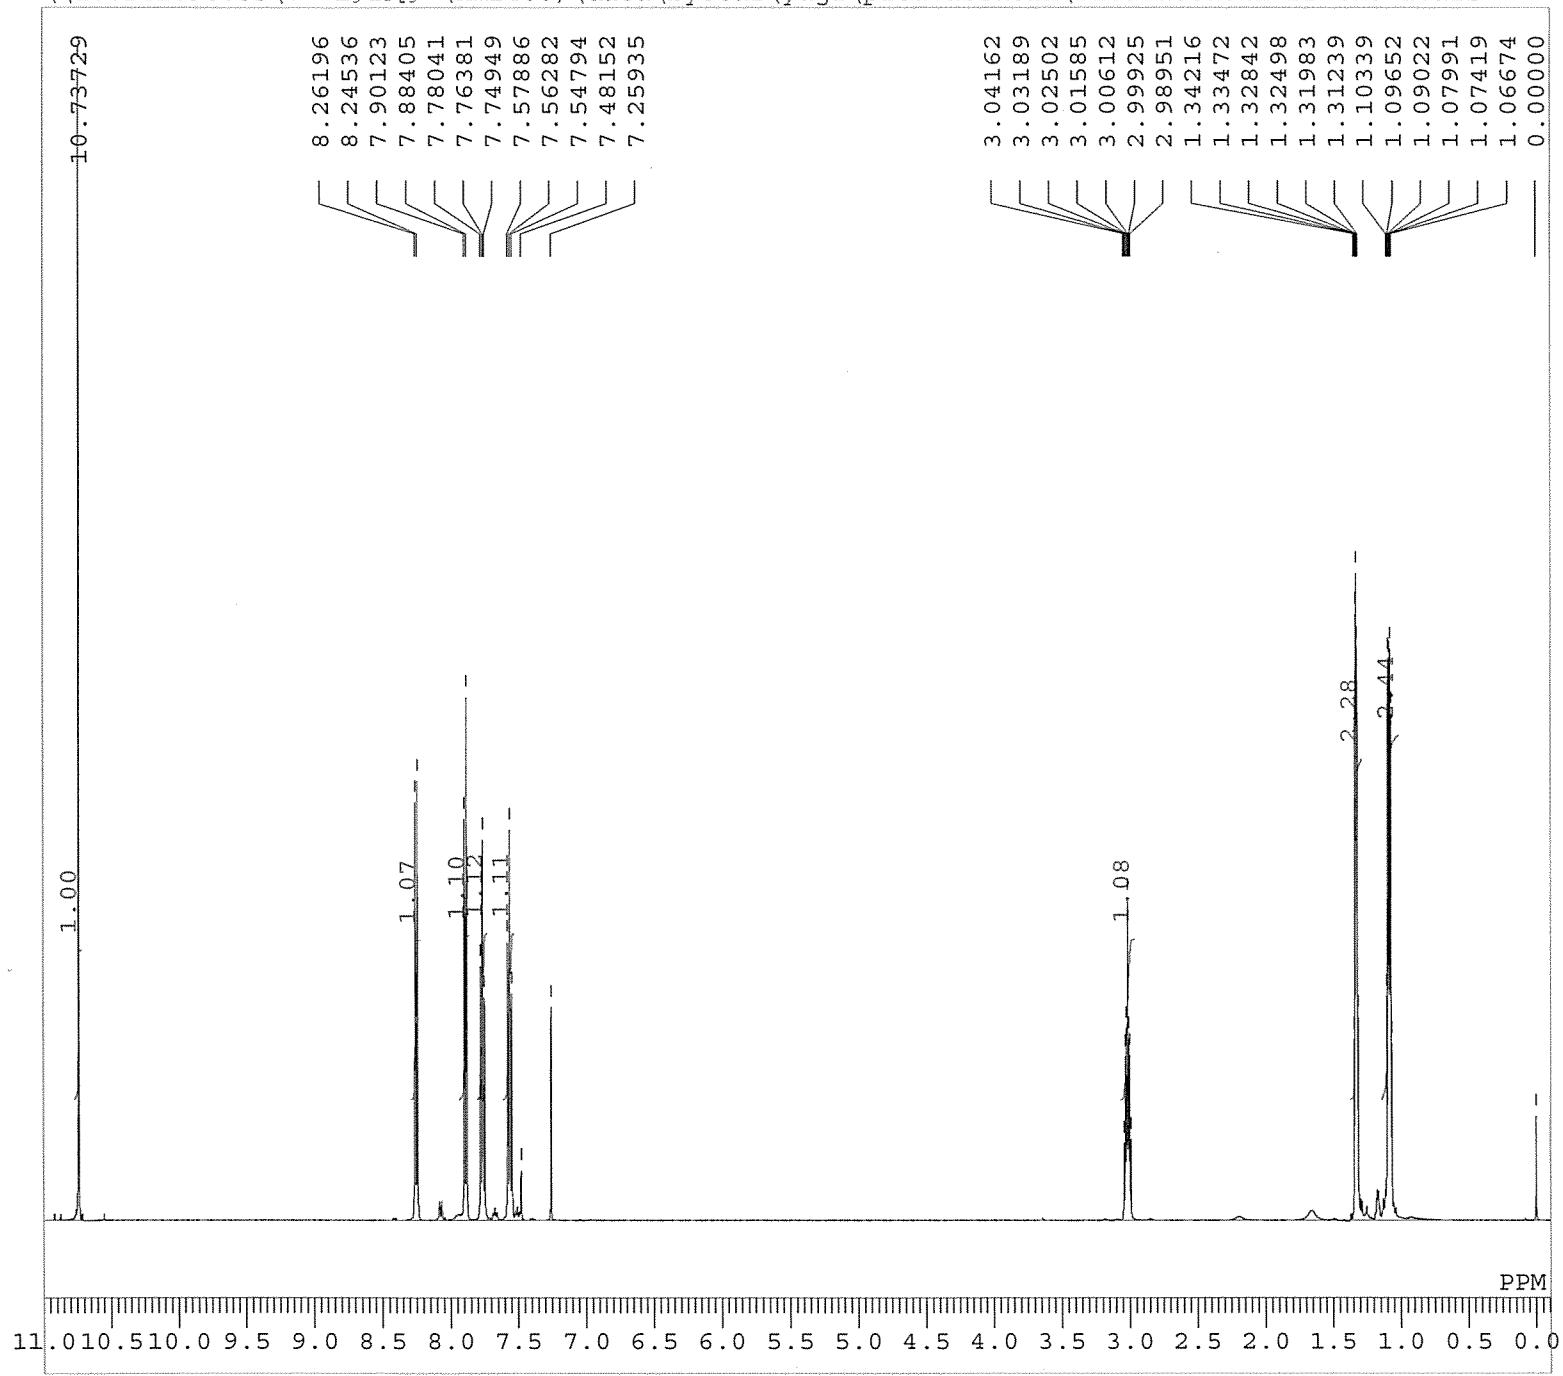

DFILE Pitavastatin-Br-CHO-1.als  
 COMNT single\_pulse  
 DATIM 2013-04-16 15:22:28  
 OBNUC 1H  
 EXMOD single\_pulse.ex2  
 OBFREQ 500.16 MHz  
 OBSET 2.41 KHz  
 OBFIN 6.01 Hz  
 POINT 26214  
 FREQU 7507.39 Hz  
 SCANS 16  
 ACQTM 1.7459 sec  
 PD 5.0000 sec  
 PW1 6.50 usec  
 IRNUC 1H  
 CTEMP 25.6 c  
 SLVNT CDCL3  
 EXREF 0.00 ppm  
 BF 0.12 Hz  
 RGAIN 40

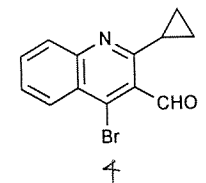



Compound 4

\\10.242.96.55\< n-Lffl[f^(nmr400)\data\byotai\yagi\pitavastatin\Pitavastatin-Br-CHO-C13-1.als

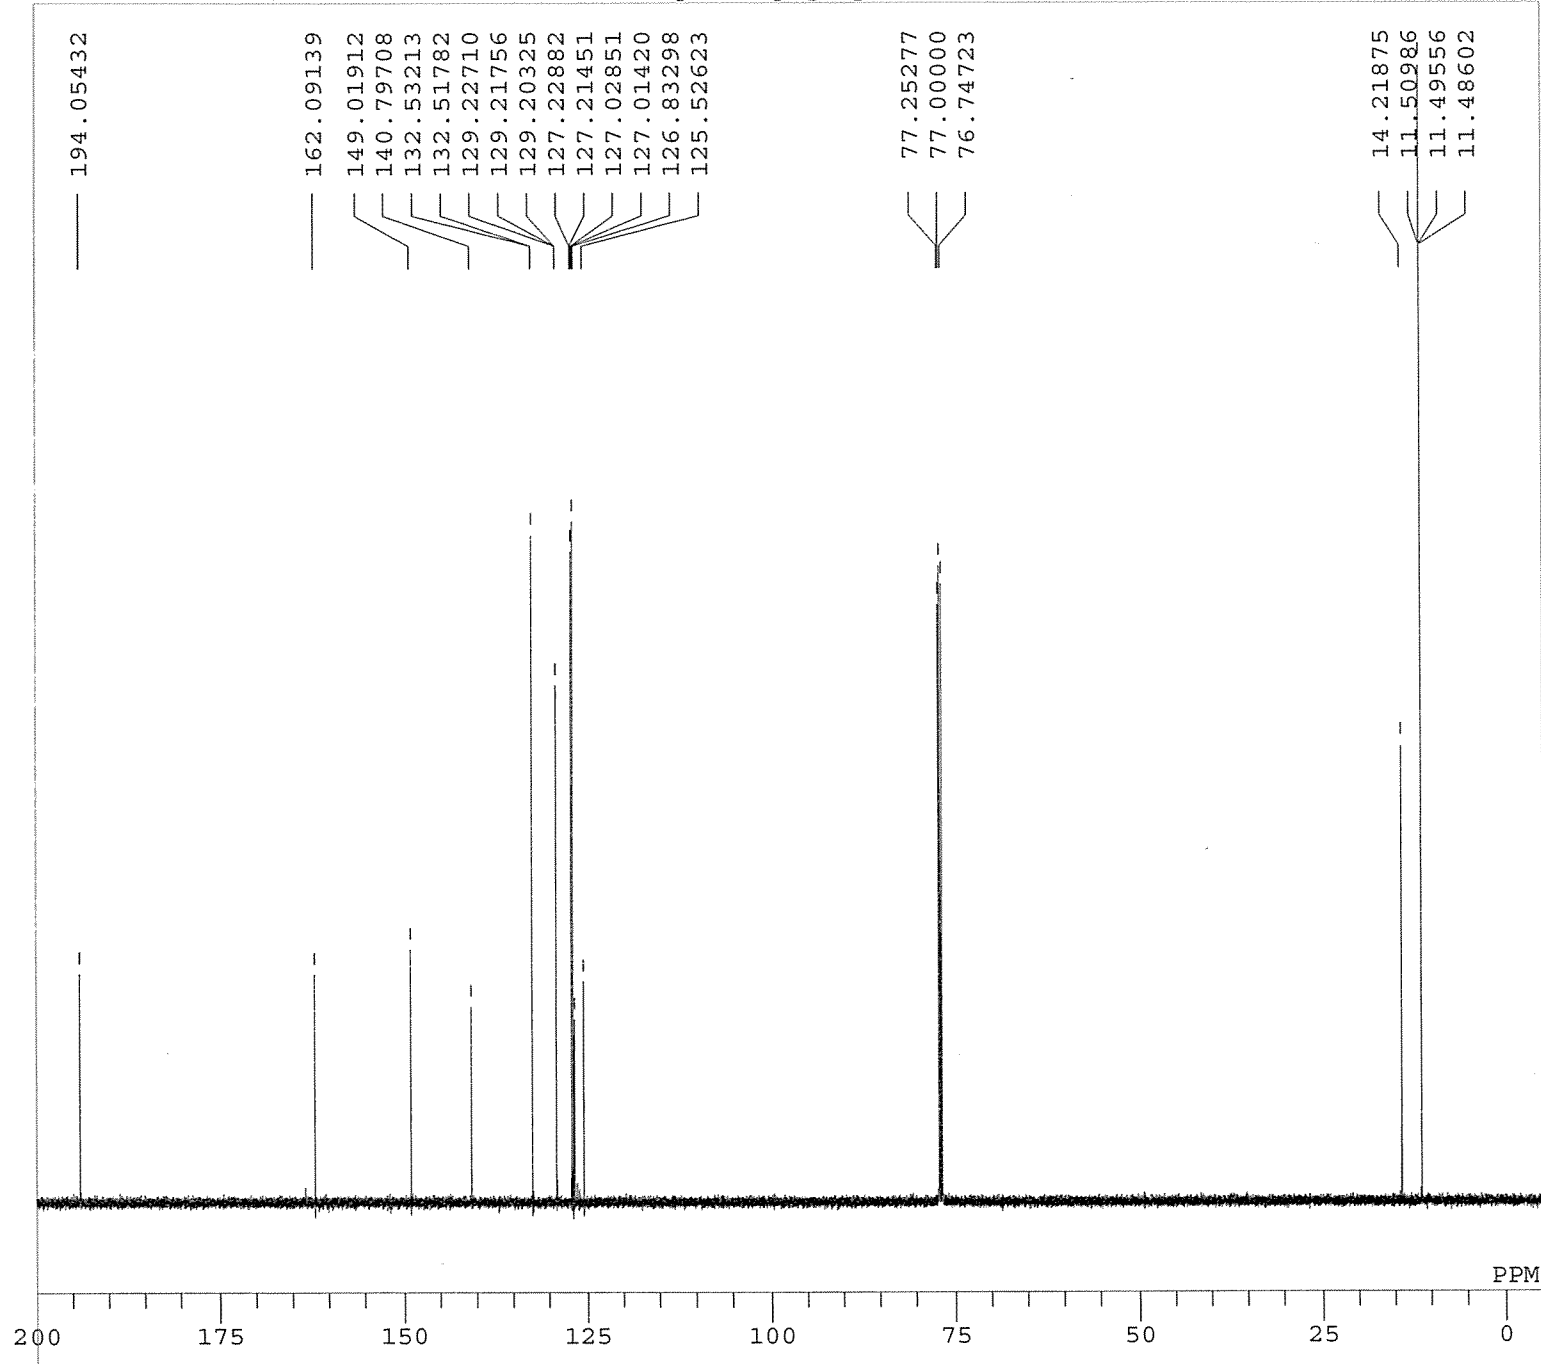

DFILE Pitavastatin-Br-CHO-C13-1  
 COMNT single pulse decoupled ga  
 DATIM 2013-04-16 15:53:43  
 OBNUC 13C  
 EXMOD single\_pulse\_dec  
 OBFRQ 125.77 MHz  
 OBSET 7.87 KHz  
 OBFIN 4.21 Hz  
 POINT 52428  
 FREQU 31446.06 Hz  
 SCANS 640  
 ACQTM 0.8336 sec  
 PD 2.0000 sec  
 PW1 3.73 usec  
 IRNUC 1H  
 CTEMP 25.8 c  
 SLVNT CDCL3  
 EXREF 77.00 ppm  
 BF 0.12 Hz  
 RGAIN 54

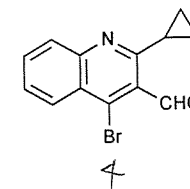

Compound 9

\\10.242.96.55\<µ-Lffl[f^(nmr400)\data\byotai\yagi\pitavastatin\Pitavastatin-C=O-OTBS-1.als

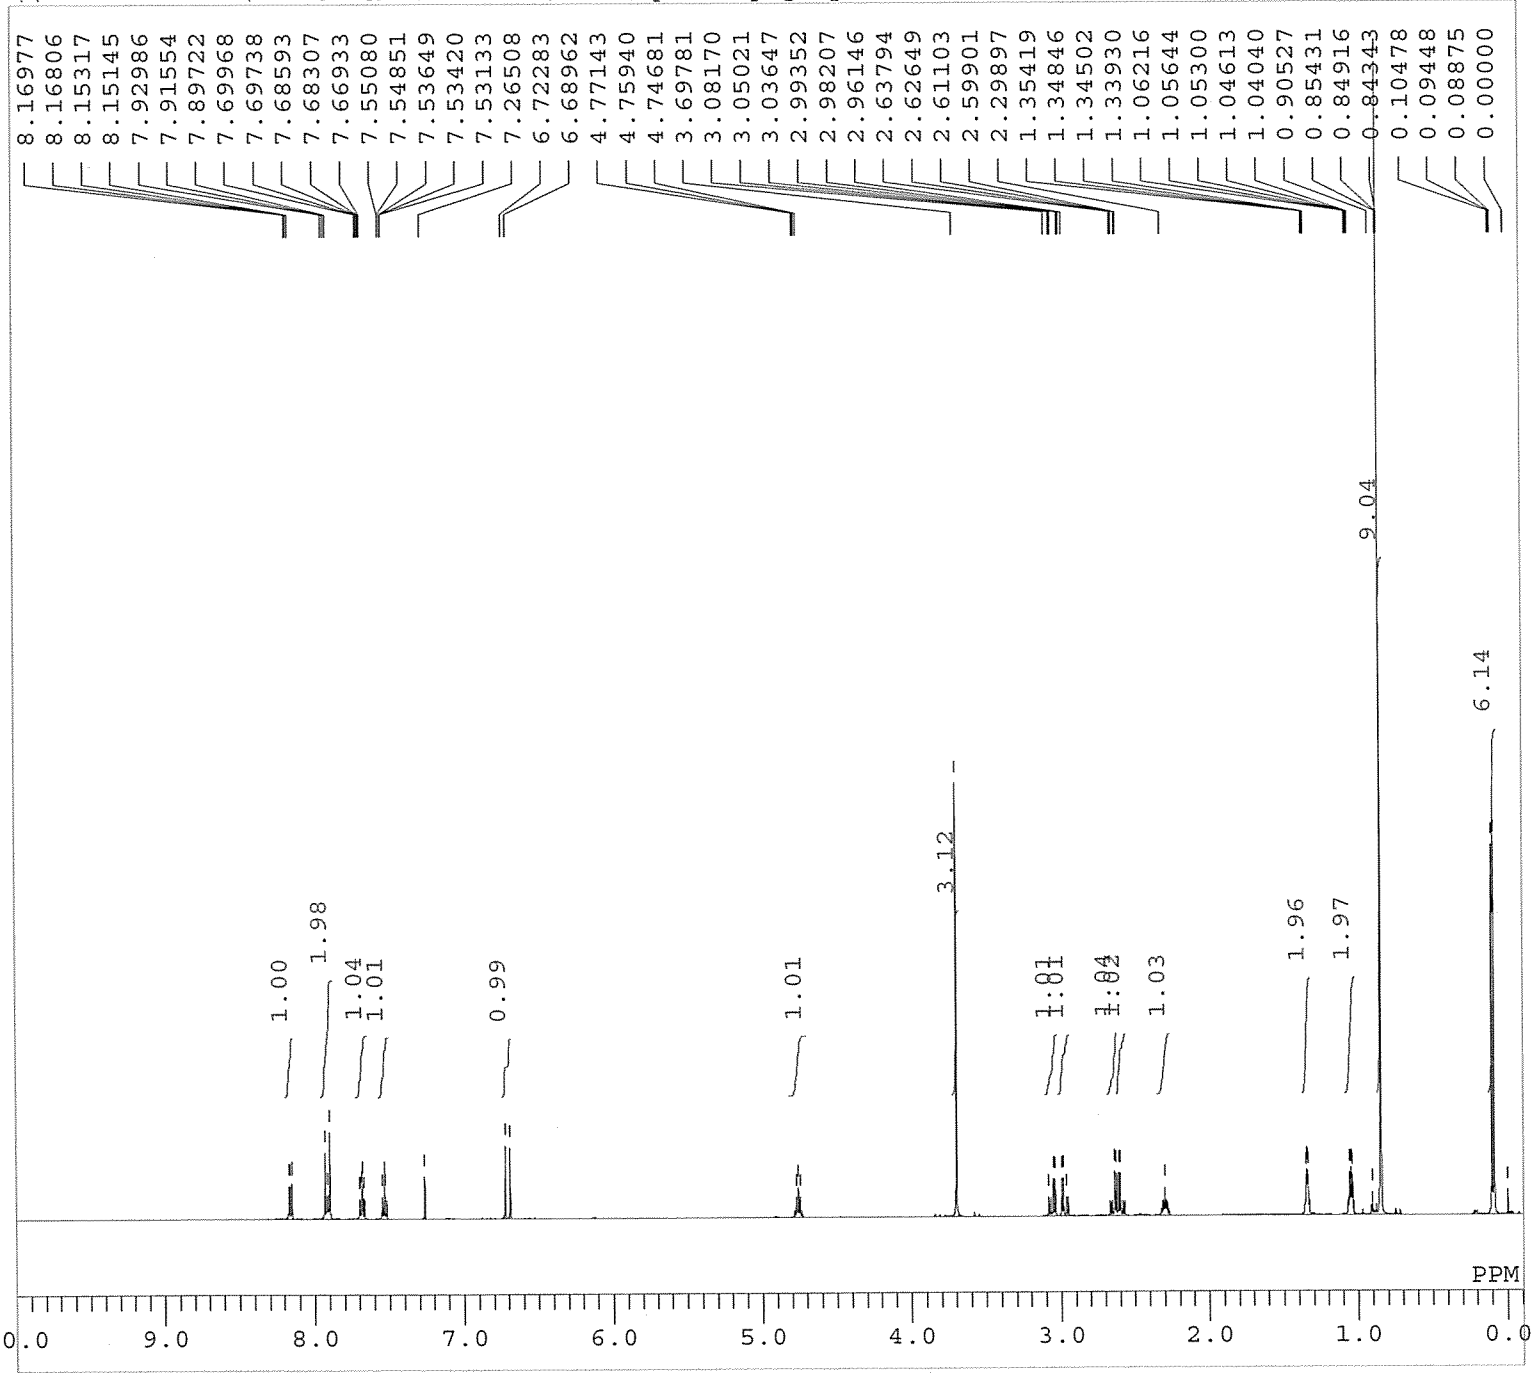

DFILE Pitavastatin-C=O-OTBS-1.a  
 COMNT single\_pulse  
 DATIM 2013-04-05 21:25:37  
 OBNUC 1H  
 EXMOD single\_pulse.ex2  
 OBFRQ 500.16 MHz  
 OBSET 2.41 KHz  
 OBFIN 6.01 Hz  
 POINT 26214  
 FREQU 7507.39 Hz  
 SCANS 16  
 ACQTM 1.7459 sec  
 PD 5.0000 sec  
 PW1 6.50 usec  
 IRNUC 1H  
 CTEMP 25.0 c  
 SLVNT CDCL3  
 EXREF 0.00 ppm  
 BF 0.12 Hz  
 RGAIN 36

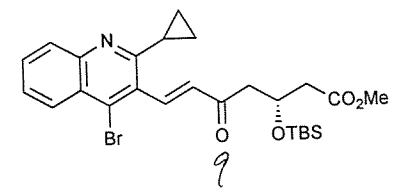

Compound 9

\\10.242.96.55\<#-Lf\ [f^ (nmr400) \data\byotai\yagi\pitavastatin\Pitavastatin-C=O-OTBS-C13-1.als

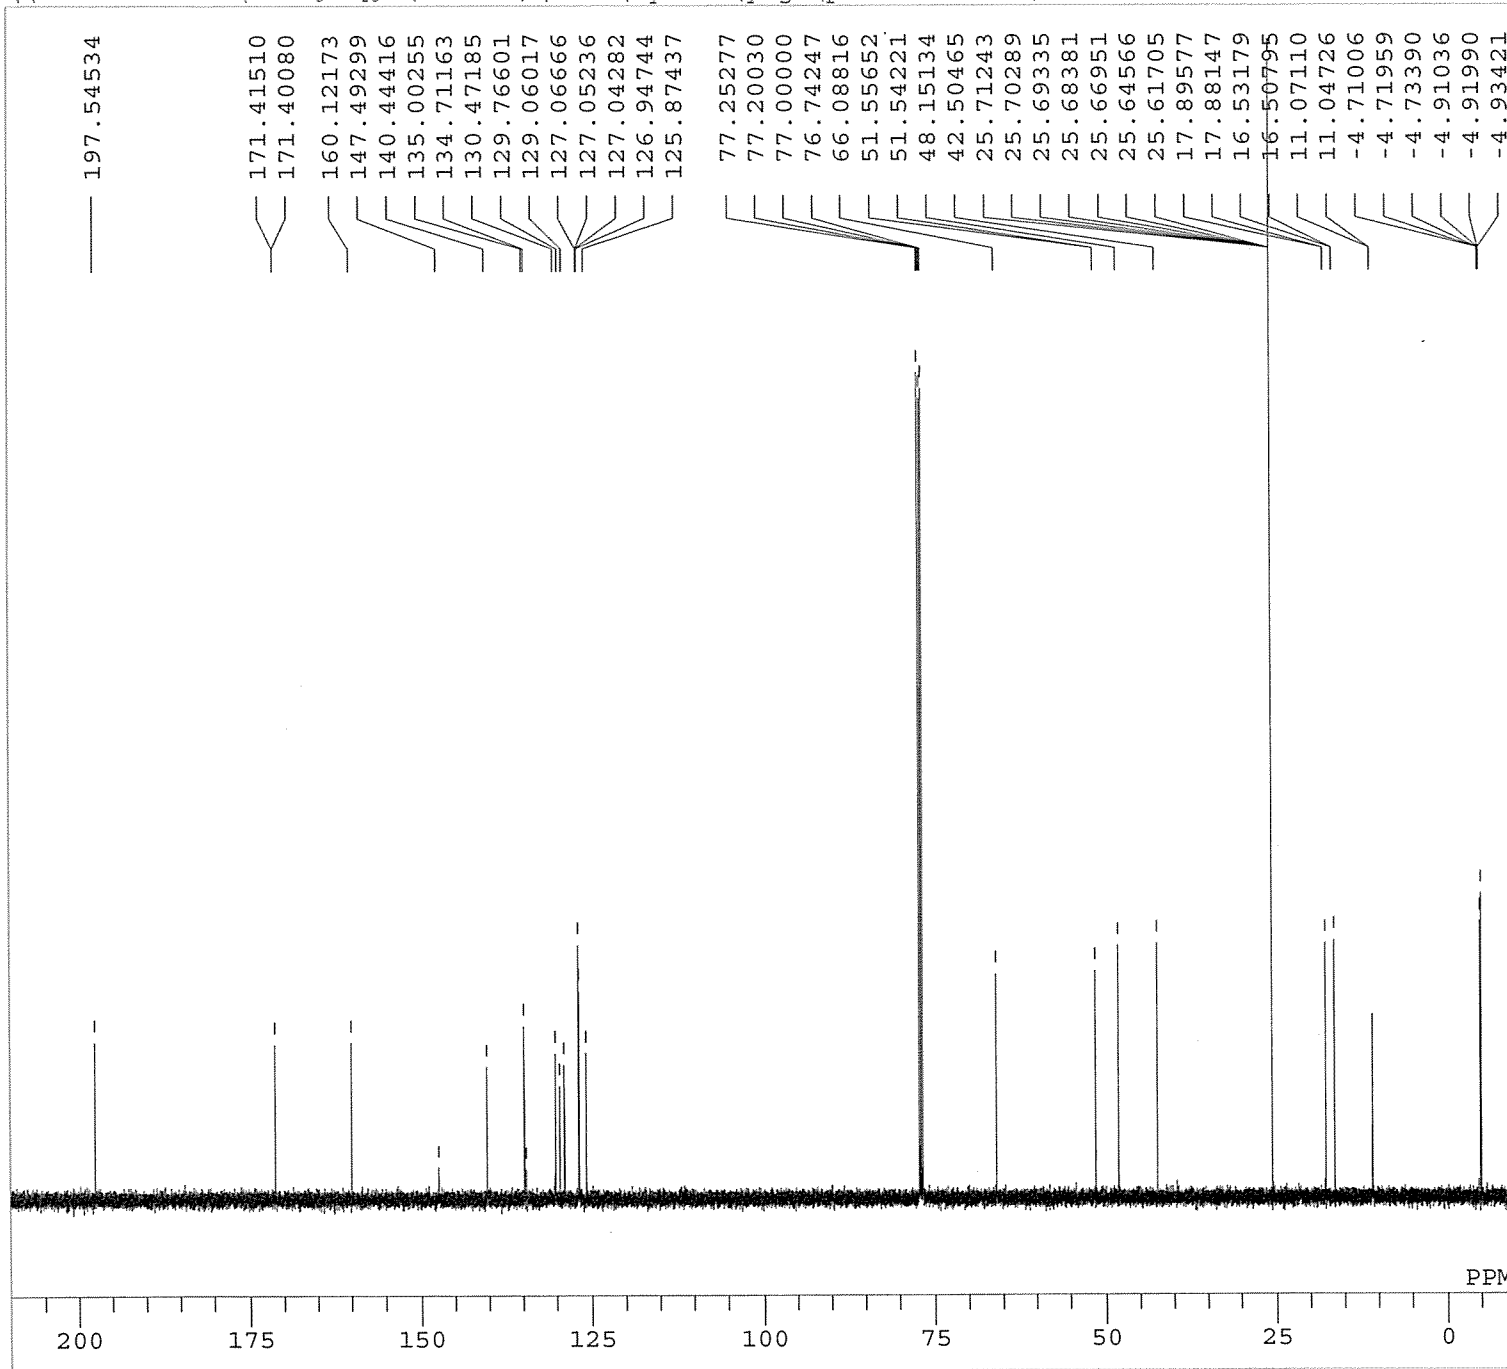

DFILE Pitavastatin-C=O-OTBS-C13  
 COMNT single pulse decoupled ga  
 DATIM 2013-04-05 21:39:04  
 OBNUC 13C  
 EXMOD single\_pulse\_dec  
 OBFREQ 125.77 MHz  
 OBSET 7.87 KHz  
 OBFIN 4.21 Hz  
 POINT 52428  
 FREQU 31446.06 Hz  
 SCANS 261  
 ACQTM 0.8336 sec  
 PD 2.0000 sec  
 PW1 3.73 usec  
 IRNUC 1H  
 CTEMP 25.7 c  
 SLVNT CDCL3  
 EXREF 77.00 ppm  
 BF 0.12 Hz  
 RGAIN 54

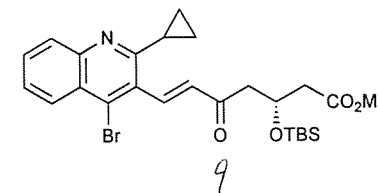

Compound 10

\\10.242.96.55\<#-Lf\ [f^(nmr400)\data\byotai\yagi\pitavastatin\Pitavastatin-C=O-OH-1.als

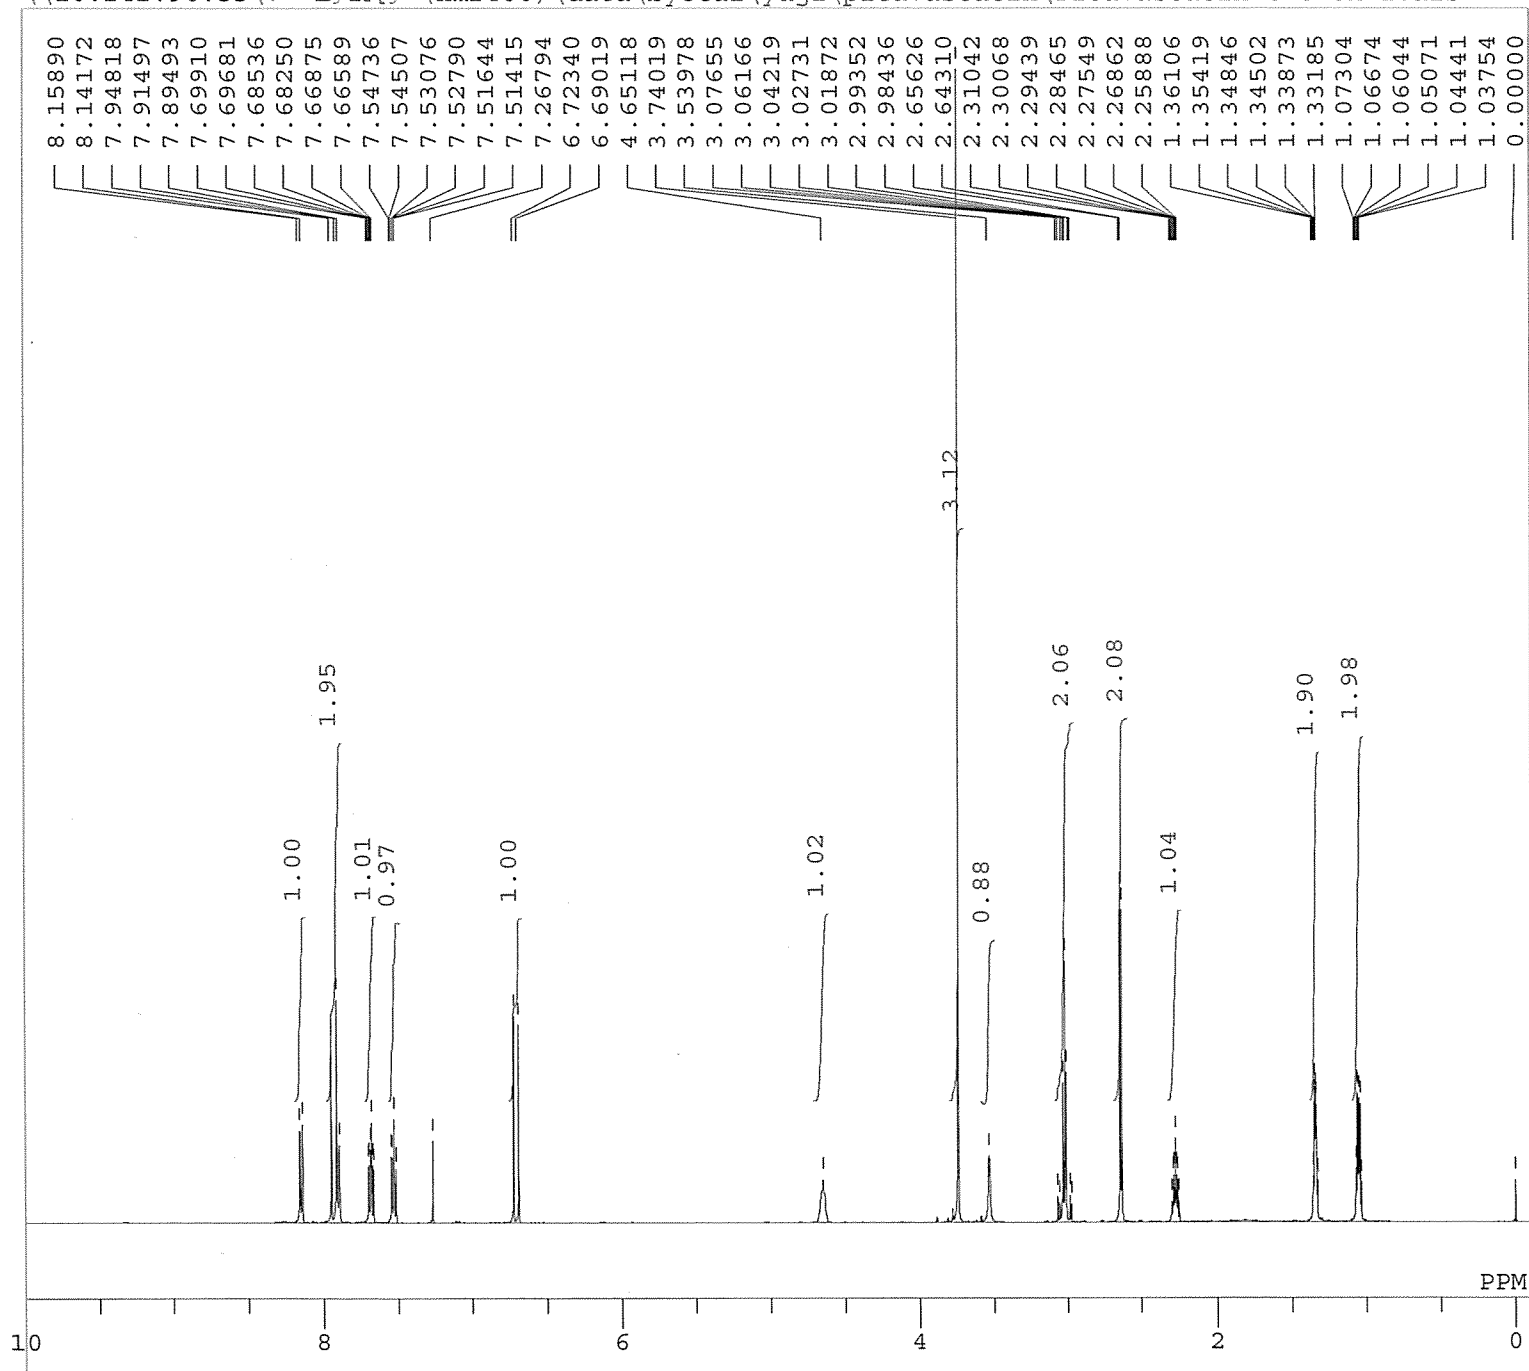

DFILE Pitavastatin-C=O-OH-1.als  
 COMNT single\_pulse  
 DATIM 2013-04-17 16:16:29  
 OBNUC 1H  
 EXMOD single\_pulse.ex2  
 OBFRQ 500.16 MHz  
 OBSET 2.41 KHz  
 OBFIN 6.01 Hz  
 POINT 26214  
 FREQU 7507.39 Hz  
 SCANS 16  
 ACQTM 1.7459 sec  
 PD 5.0000 sec  
 PW1 6.50 usec  
 IRNUC 1H  
 CTEMP 24.9 c  
 SLVNT CDCL3  
 EXREF 0.00 ppm  
 BF 0.12 Hz  
 RGAIN 40

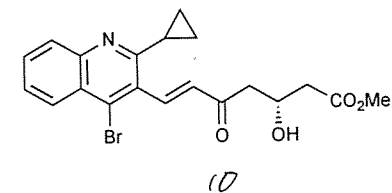

Compound 10

\\10.242.96.55\<#-Lf\ [f^(nmr400)\data\byotai\yagi\pitavastatin\Pitavastatin-C=O-OH-1.als



DFILE Pitavastatin-C=O-OH-1.als  
 COMNT single\_pulse  
 DATIM 2013-04-17 16:16:29  
 OBNUC 1H  
 EXMOD single\_pulse.ex2  
 OBFRQ 500.16 MHz  
 OBSET 2.41 KHz  
 OBFIN 6.01 Hz  
 POINT 26214  
 FREQU 7507.39 Hz  
 SCANS 16  
 ACQTM 1.7459 sec  
 PD 5.0000 sec  
 PW1 6.50 usec  
 IRNUC 1H  
 CTEMP 24.9 c  
 SLVNT CDCL3  
 EXREF 0.00 ppm  
 BF 0.12 Hz  
 RGAIN 40

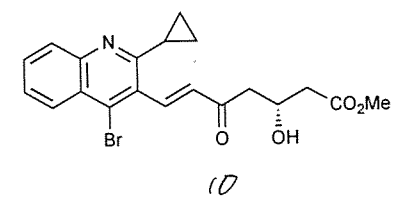

Compound 11

\\10.242.96.55\< #-Lffl[f^(nmr400)\data\byotai\yagi\pitavastatin\Pitavastatin-diol-1.als

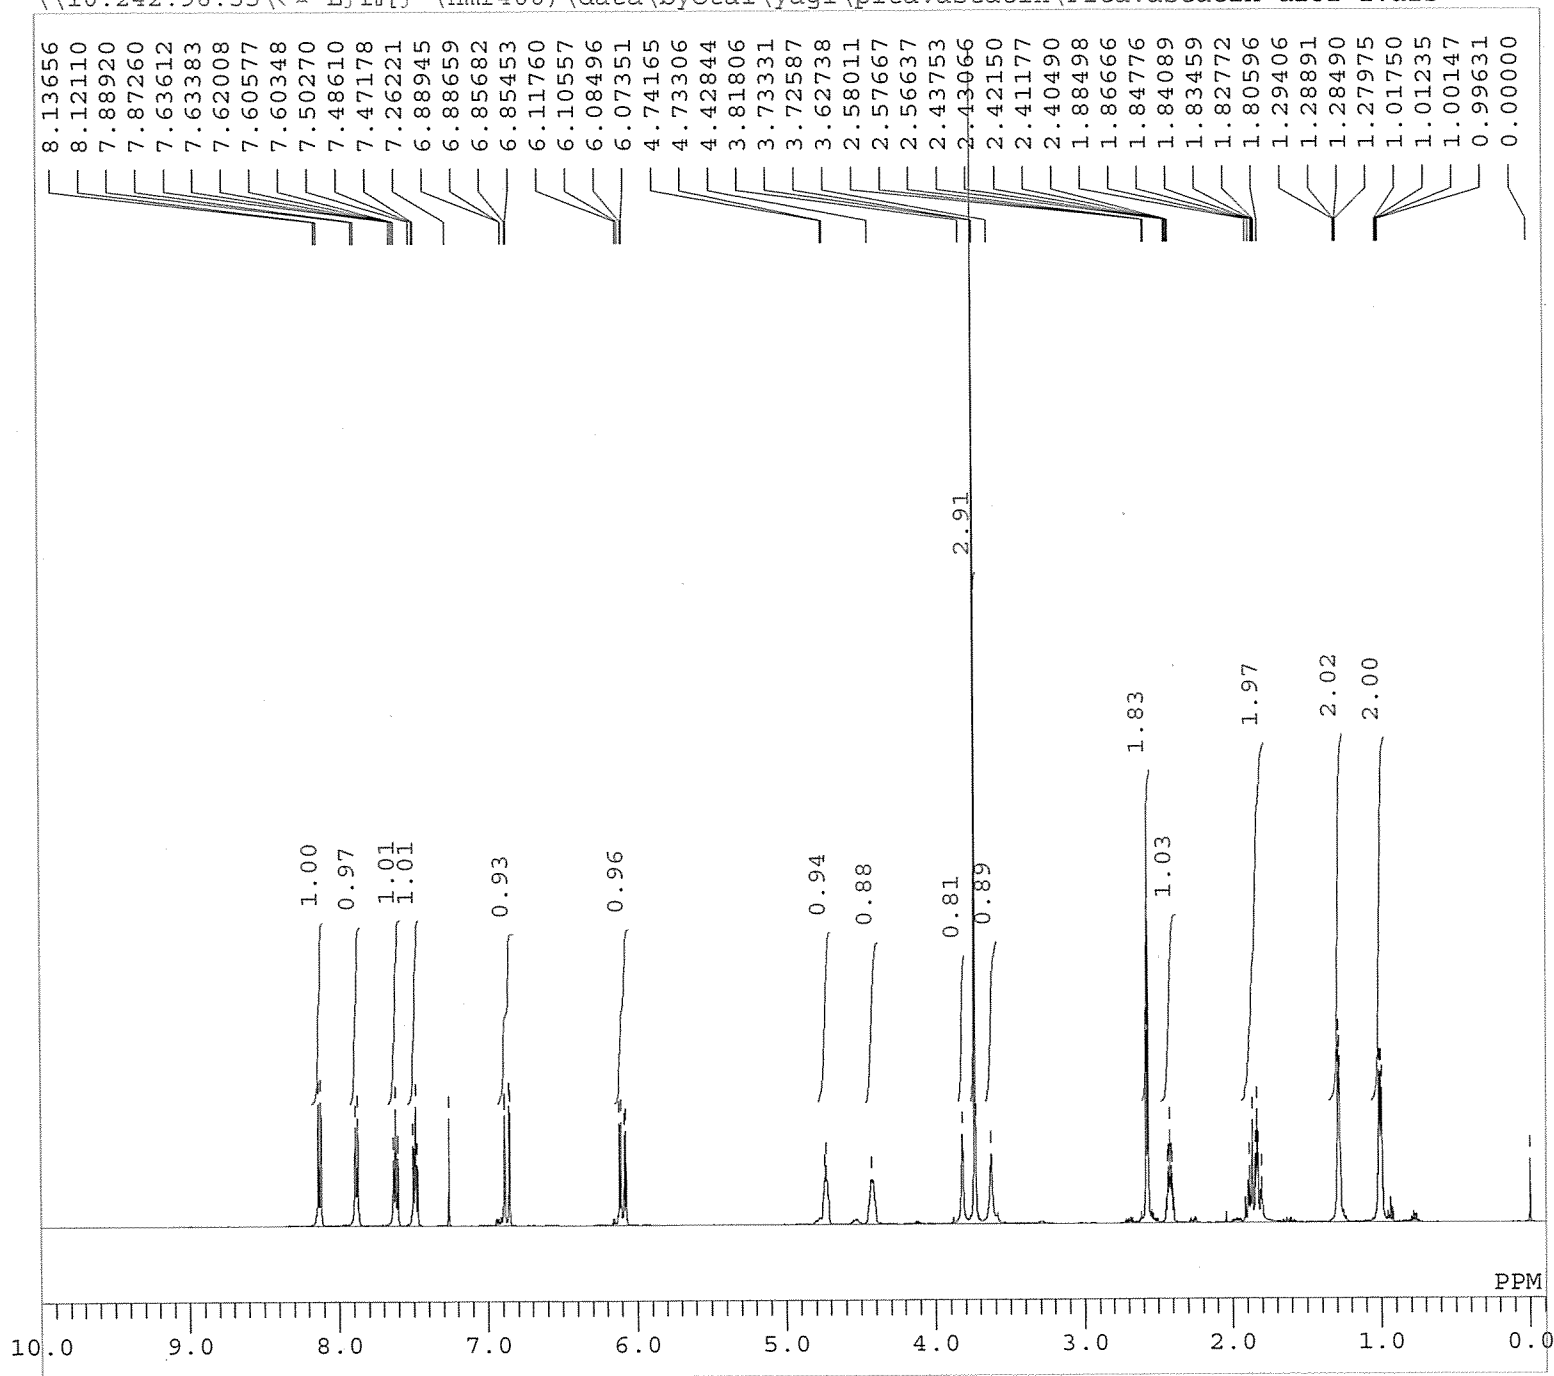

```

DFILE Pitavastatin-diol-1.als
COMNT single_pulse
DATIM 2013-04-04 13:12:48
OBNUC 1H
EXMOD single_pulse.ex2
OBFRQ 500.16 MHz
OBSET 2.41 KHz
OBFIN 6.01 Hz
POINT 26214
FREQU 7507.39 Hz
SCANS 16
ACQTM 1.7459 sec
PD 5.0000 sec
PW1 6.50 usec
IRNUC 1H
CTEMP 25.4 c
SLVNT CDCL3
EXREF 0.00 ppm
BF 0.12 Hz
RGAIN 38
    
```

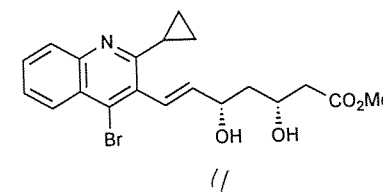

Compound 11

\\10.242.96.55\< n-Lffll[f^(nmr400)\data\byotai\yagi\pitavastatin\Pitavastatin-diol-C13-1.als

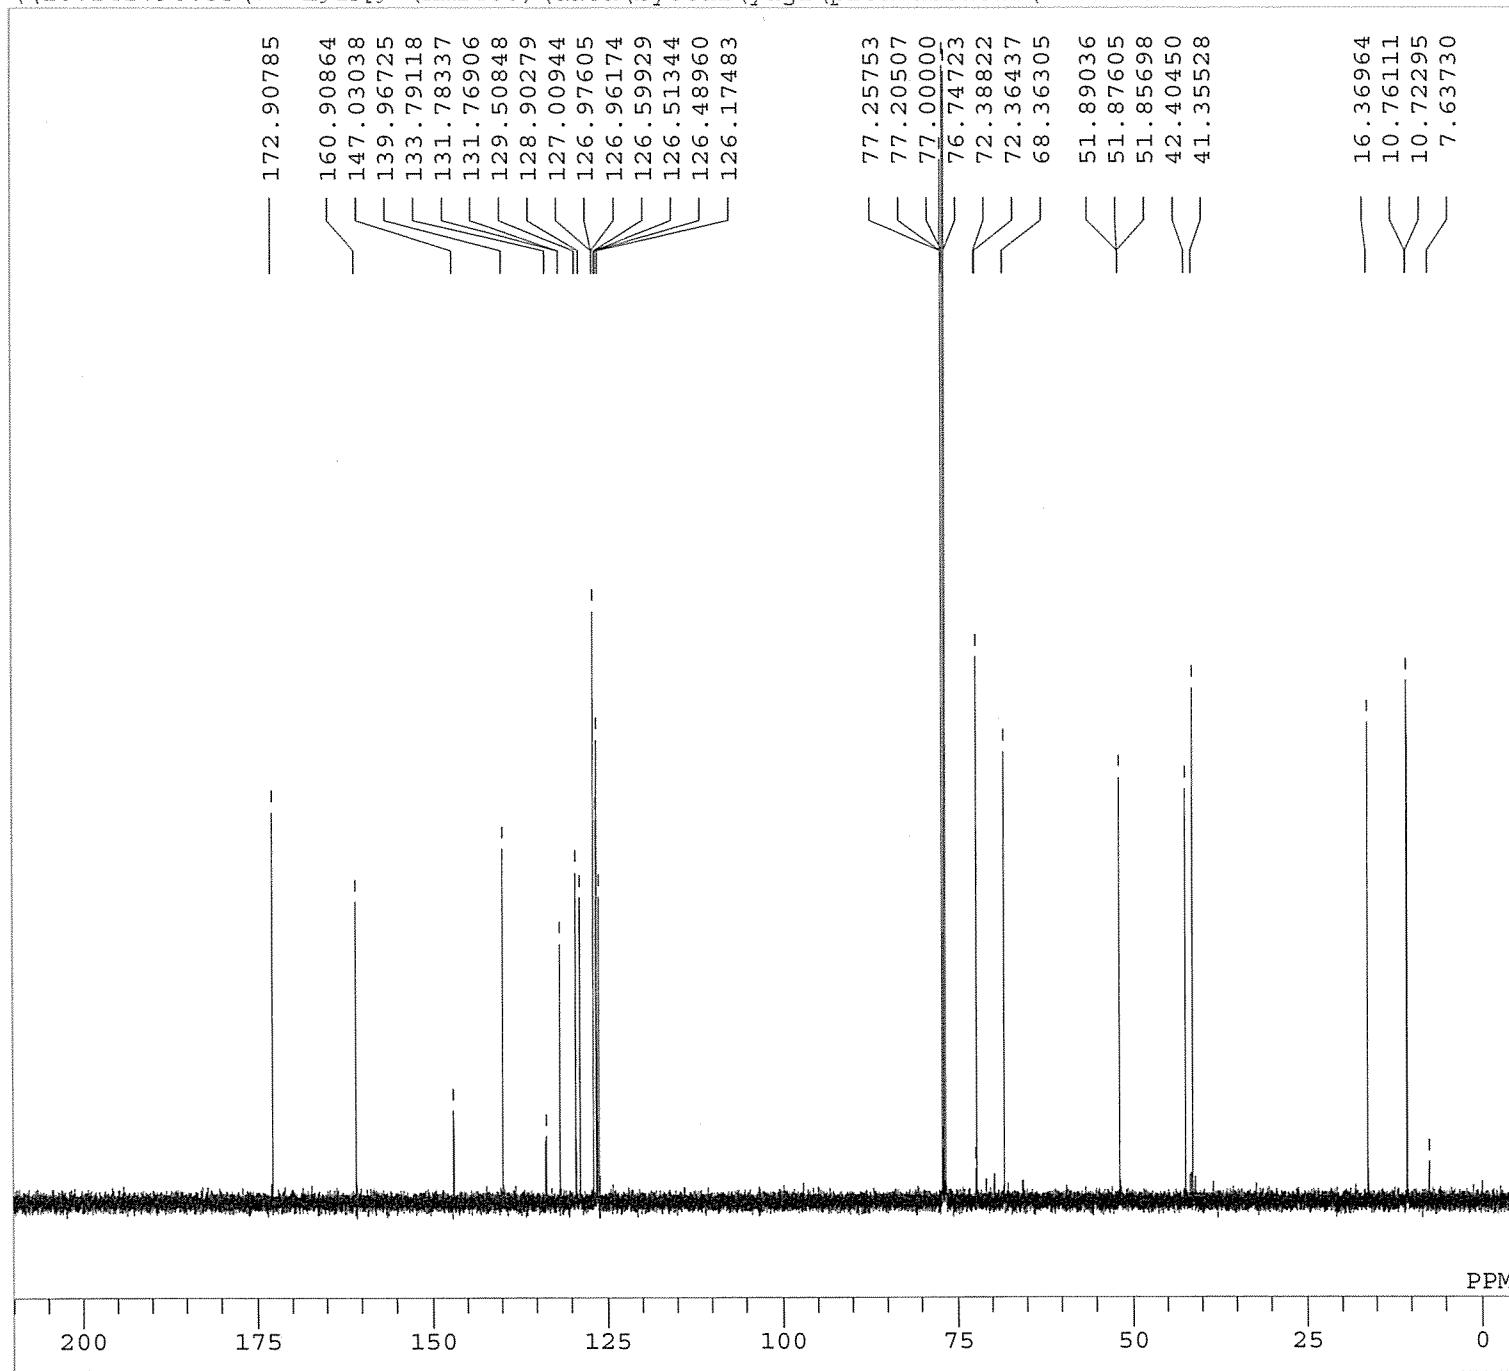

DFILE Pitavastatin-diol-C13-1.a  
 COMNT single pulse decoupled ga  
 DATIM 2013-04-04 13:42:07  
 OBNUC 13C  
 EXMOD single\_pulse\_dec  
 OBFREQ 125.77 MHz  
 OBSET 7.87 KHz  
 OBFIN 4.21 Hz  
 POINT 52428  
 FREQU 31446.06 Hz  
 SCANS 602  
 ACQTM 0.8336 sec  
 PD 2.0000 sec  
 PW1 3.73 usec  
 IRNUC 1H  
 CTEMP 25.7 c  
 SLVNT CDCL3  
 EXREF 77.00 ppm  
 BF 0.12 Hz  
 RGAIN 54

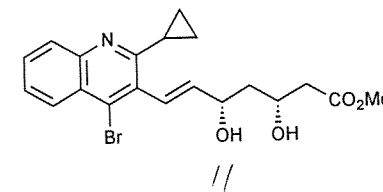

Compound 2

\\10.242.96.55\< n-Lffl[f^(nmr400)\data\byotai\yagi\pitavastatin\Pitavastatin-Comp24-1.als

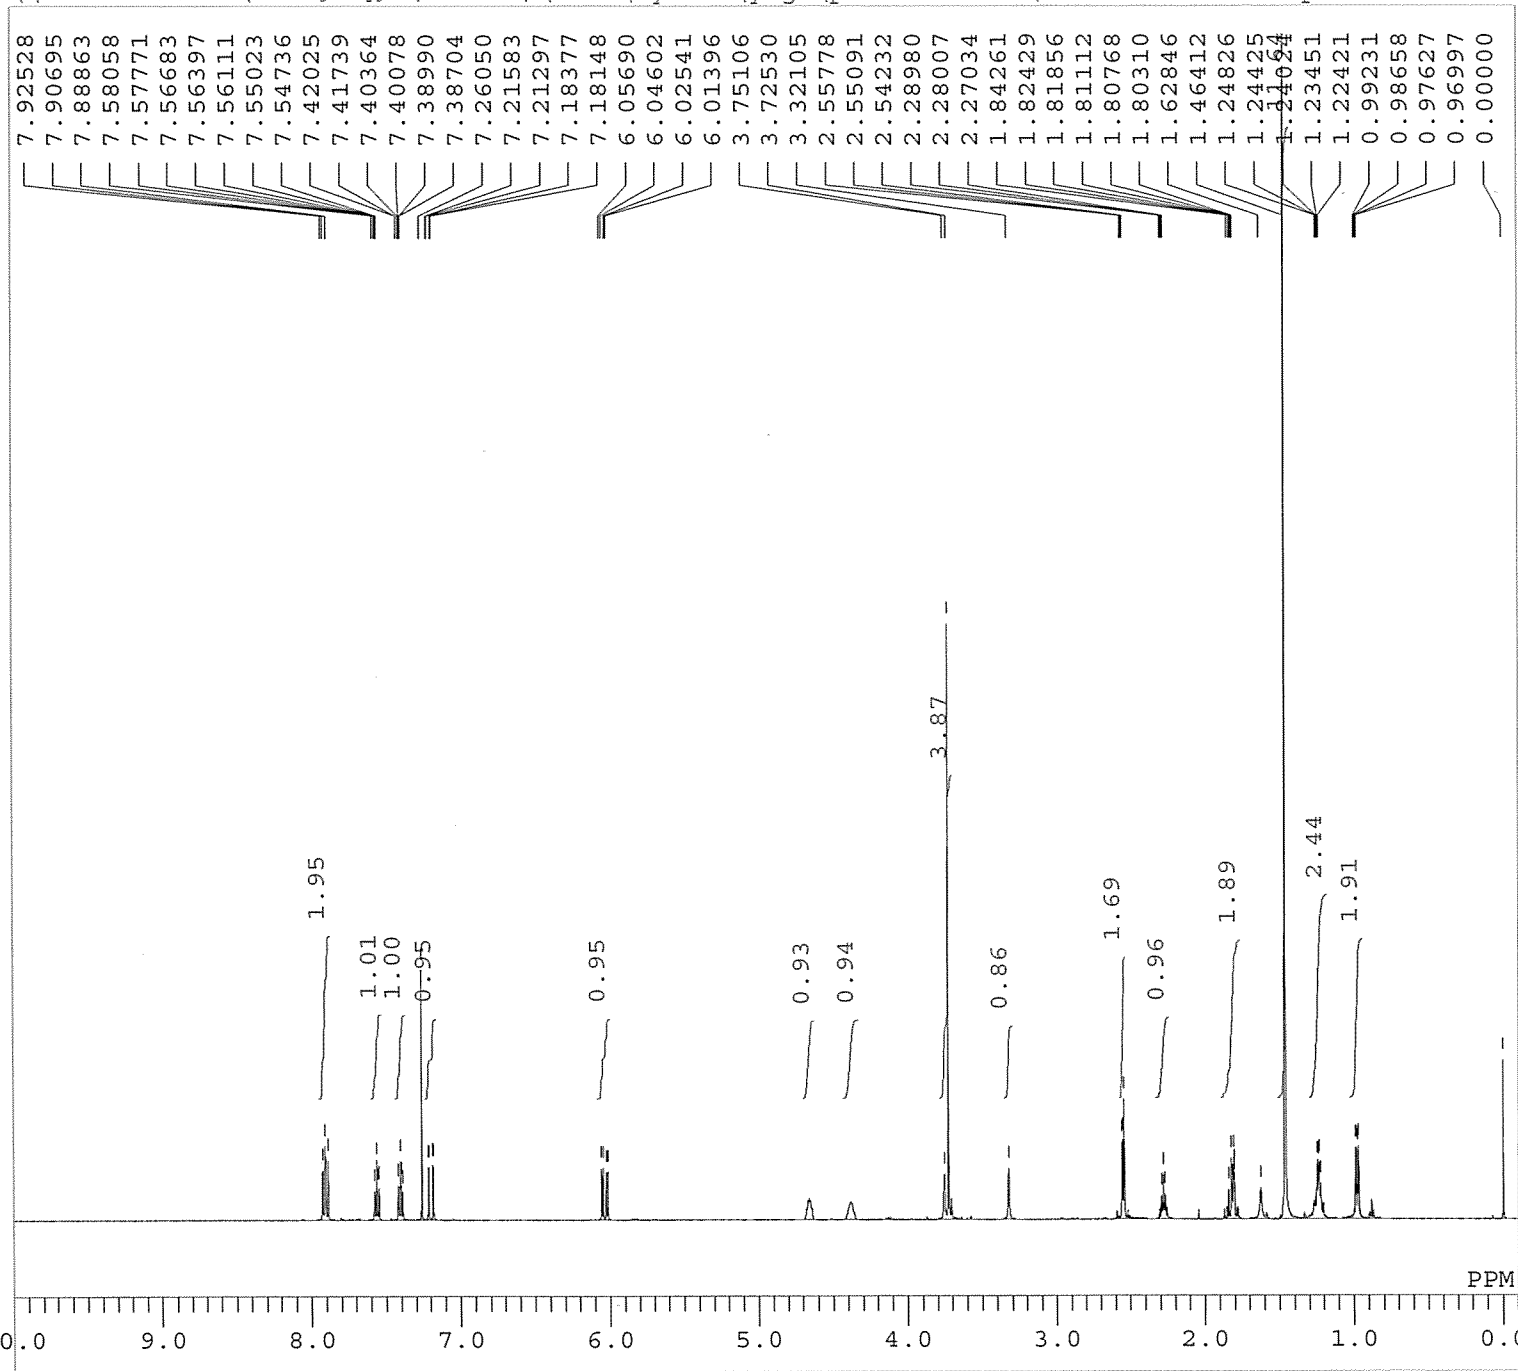

DFILE Pitavastatin-Comp24-1.als  
 COMNT single\_pulse  
 DATIM 2013-04-23 14:13:44  
 OBNUC 1H  
 EXMOD single\_pulse.ex2  
 OBFREQ 500.16 MHz  
 OBSET 2.41 KHz  
 OBFIN 6.01 Hz  
 POINT 26214  
 FREQU 7507.39 Hz  
 SCANS 16  
 ACQTM 1.7459 sec  
 PD 5.0000 sec  
 PW1 6.50 usec  
 IRNUC 1H  
 CTEMP 401.9 c  
 SLVNT CDCL3  
 EXREF 0.00 ppm  
 BF 0.12 Hz  
 RGAIN 44

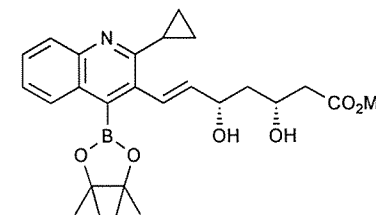



Compound 2

\\10.242.96.55\< α-Lffl[f^(nmr400)\data\byotai\yagi\pitavastatin\Pitavastatin-Comp24-C13-1.als

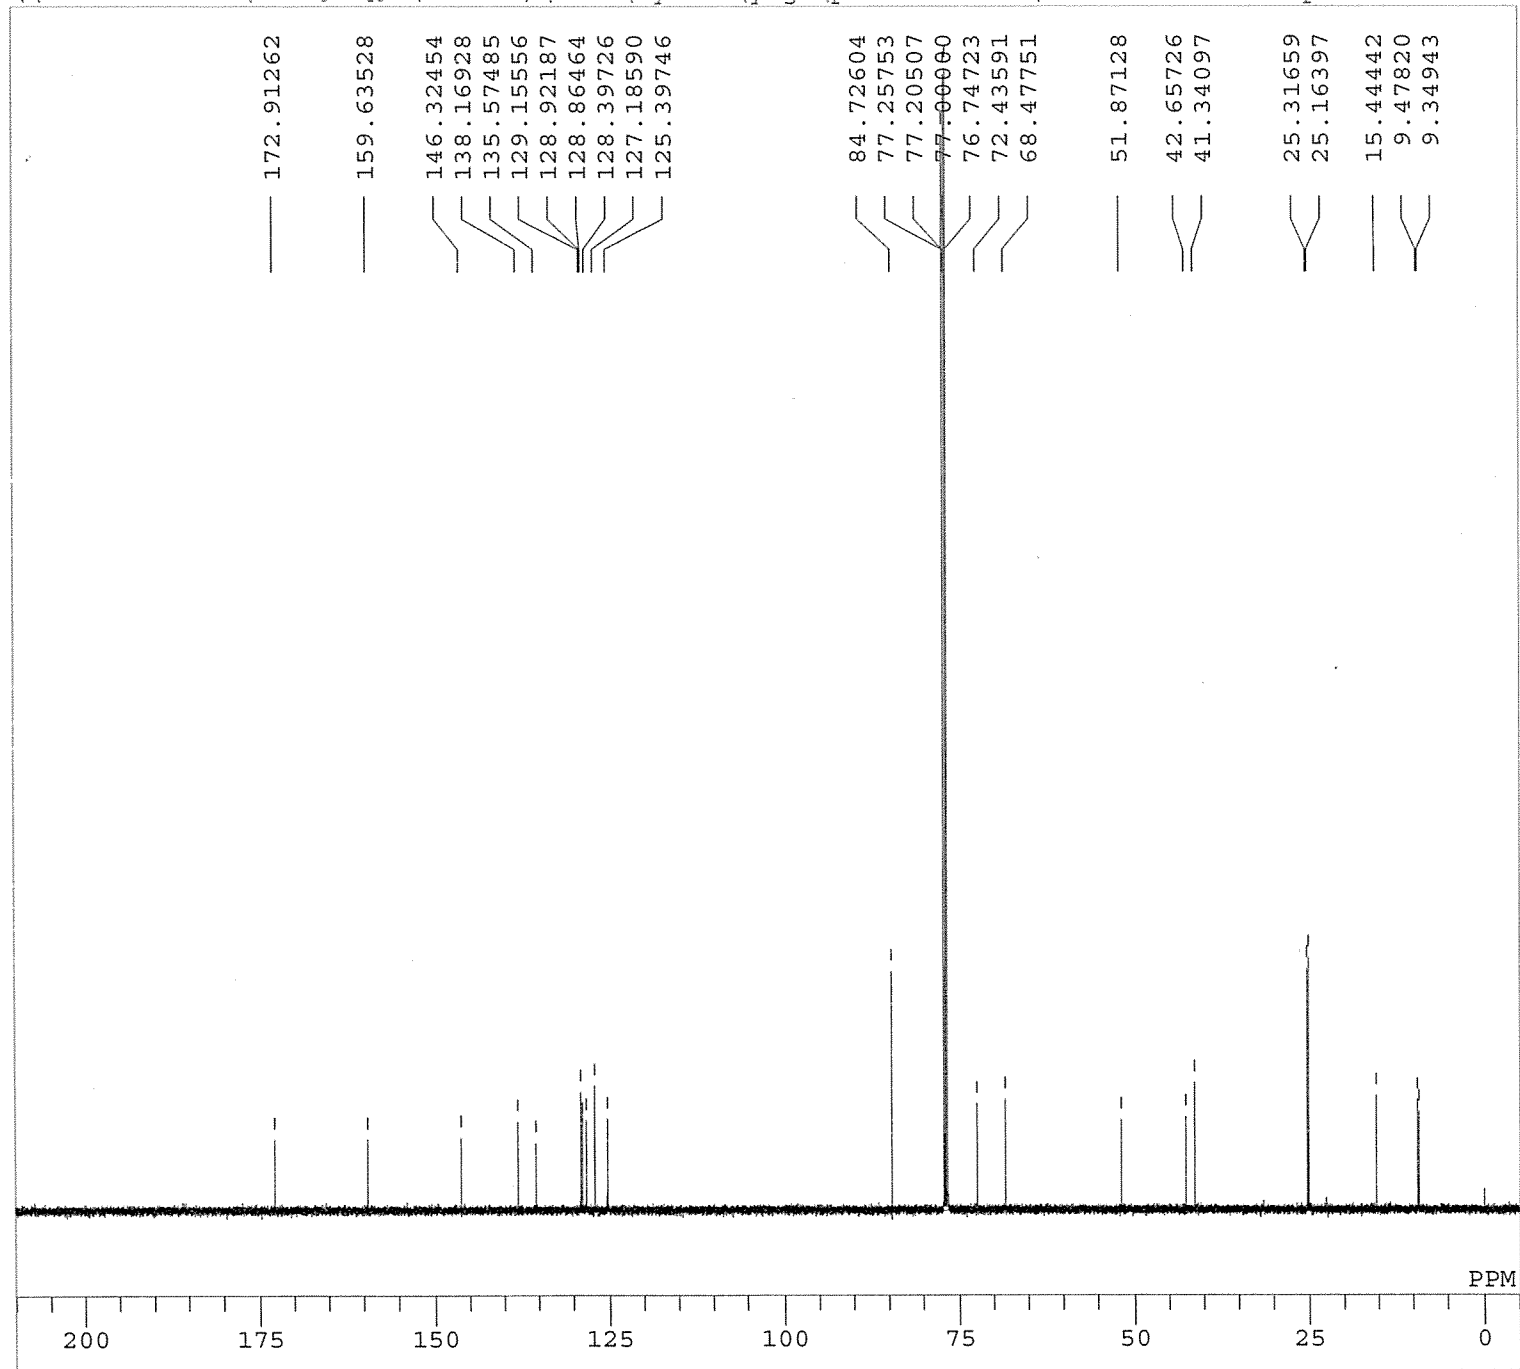

DFILE Pitavastatin-Comp24-C13-1  
 COMNT single pulse decoupled ga  
 DATIM 2013-04-23 16:29:21  
 OBNUC 13C  
 EXMOD single\_pulse\_dec  
 OBFRQ 125.77 MHz  
 OBSET 7.87 KHz  
 OBFIN 4.21 Hz  
 POINT 52428  
 FREQU 31446.06 Hz  
 SCANS 2853  
 ACQTM 0.8336 sec  
 PD 2.0000 sec  
 PW1 3.73 usec  
 IRNUC 1H  
 CTEMP 402.3 c  
 SLVNT CDCL3  
 EXREF 77.00 ppm  
 BF 0.12 Hz  
 RGAIN 54

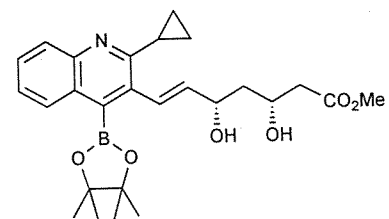

2

\\10.242.96.55\<µ-Lffl[f^(nmr400)\data\byotai\yagi\pitavastatin\Pitavastatin-Comp25-1.als

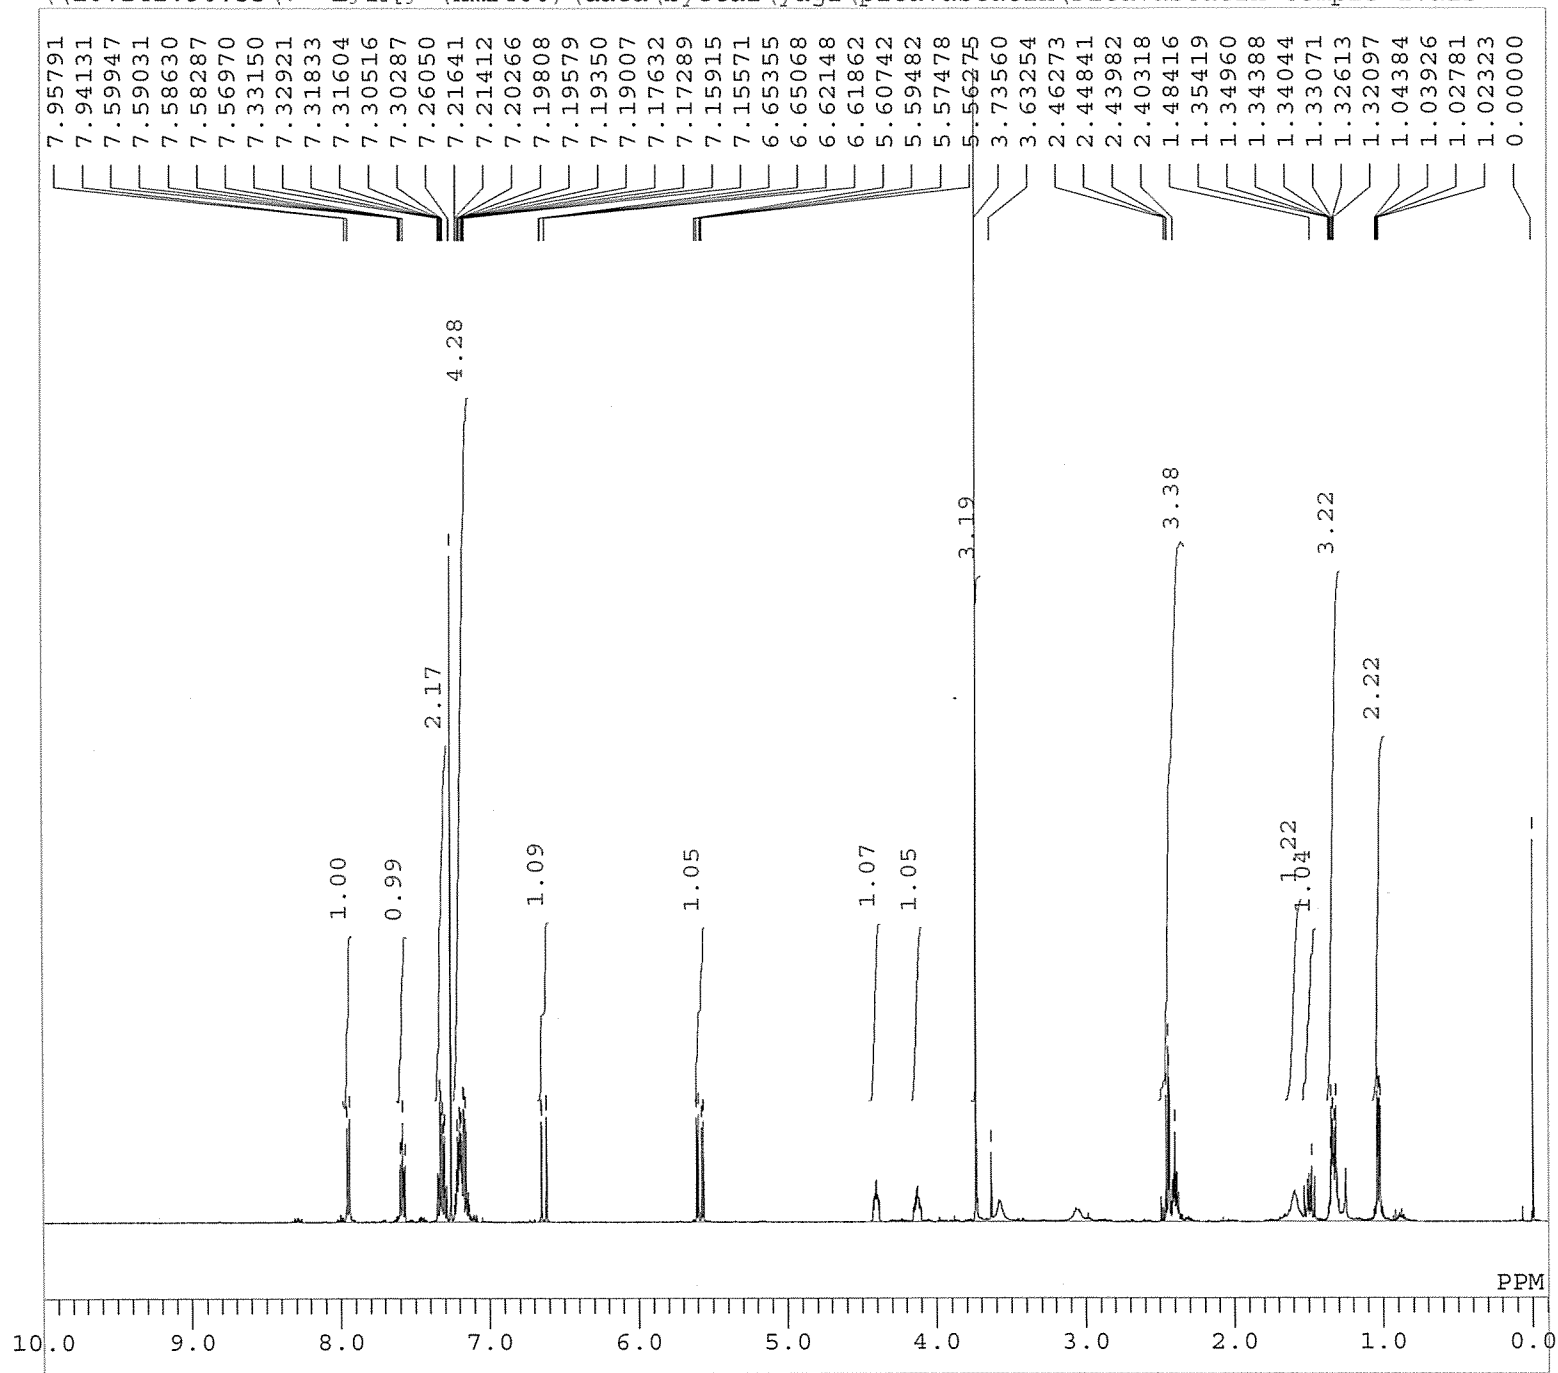

DFILE Pitavastatin-Comp25-1.als  
 COMNT single\_pulse  
 DATIM 2013-04-05 21:45:12  
 OBNUC 1H  
 EXMOD single\_pulse.ex2  
 OBFREQ 500.16 MHz  
 OBSET 2.41 KHz  
 OBFIN 6.01 Hz  
 POINT 26214  
 FREQU 7507.39 Hz  
 SCANS 16  
 ACQTM 1.7459 sec  
 PD 5.0000 sec  
 PW1 6.50 usec  
 IRNUC 1H  
 CTEMP 25.1 c  
 SLVNT CDCL3  
 EXREF 0.00 ppm  
 BF 0.12 Hz  
 RGAIN 48

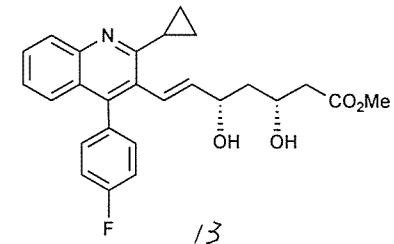

Compound 13

\\10.242.96.55\< 卣-Lffff[f^(nmr400)\data\byotai\yagi\pitavastatin\Pitavastatin-Comp25-C13-1.als

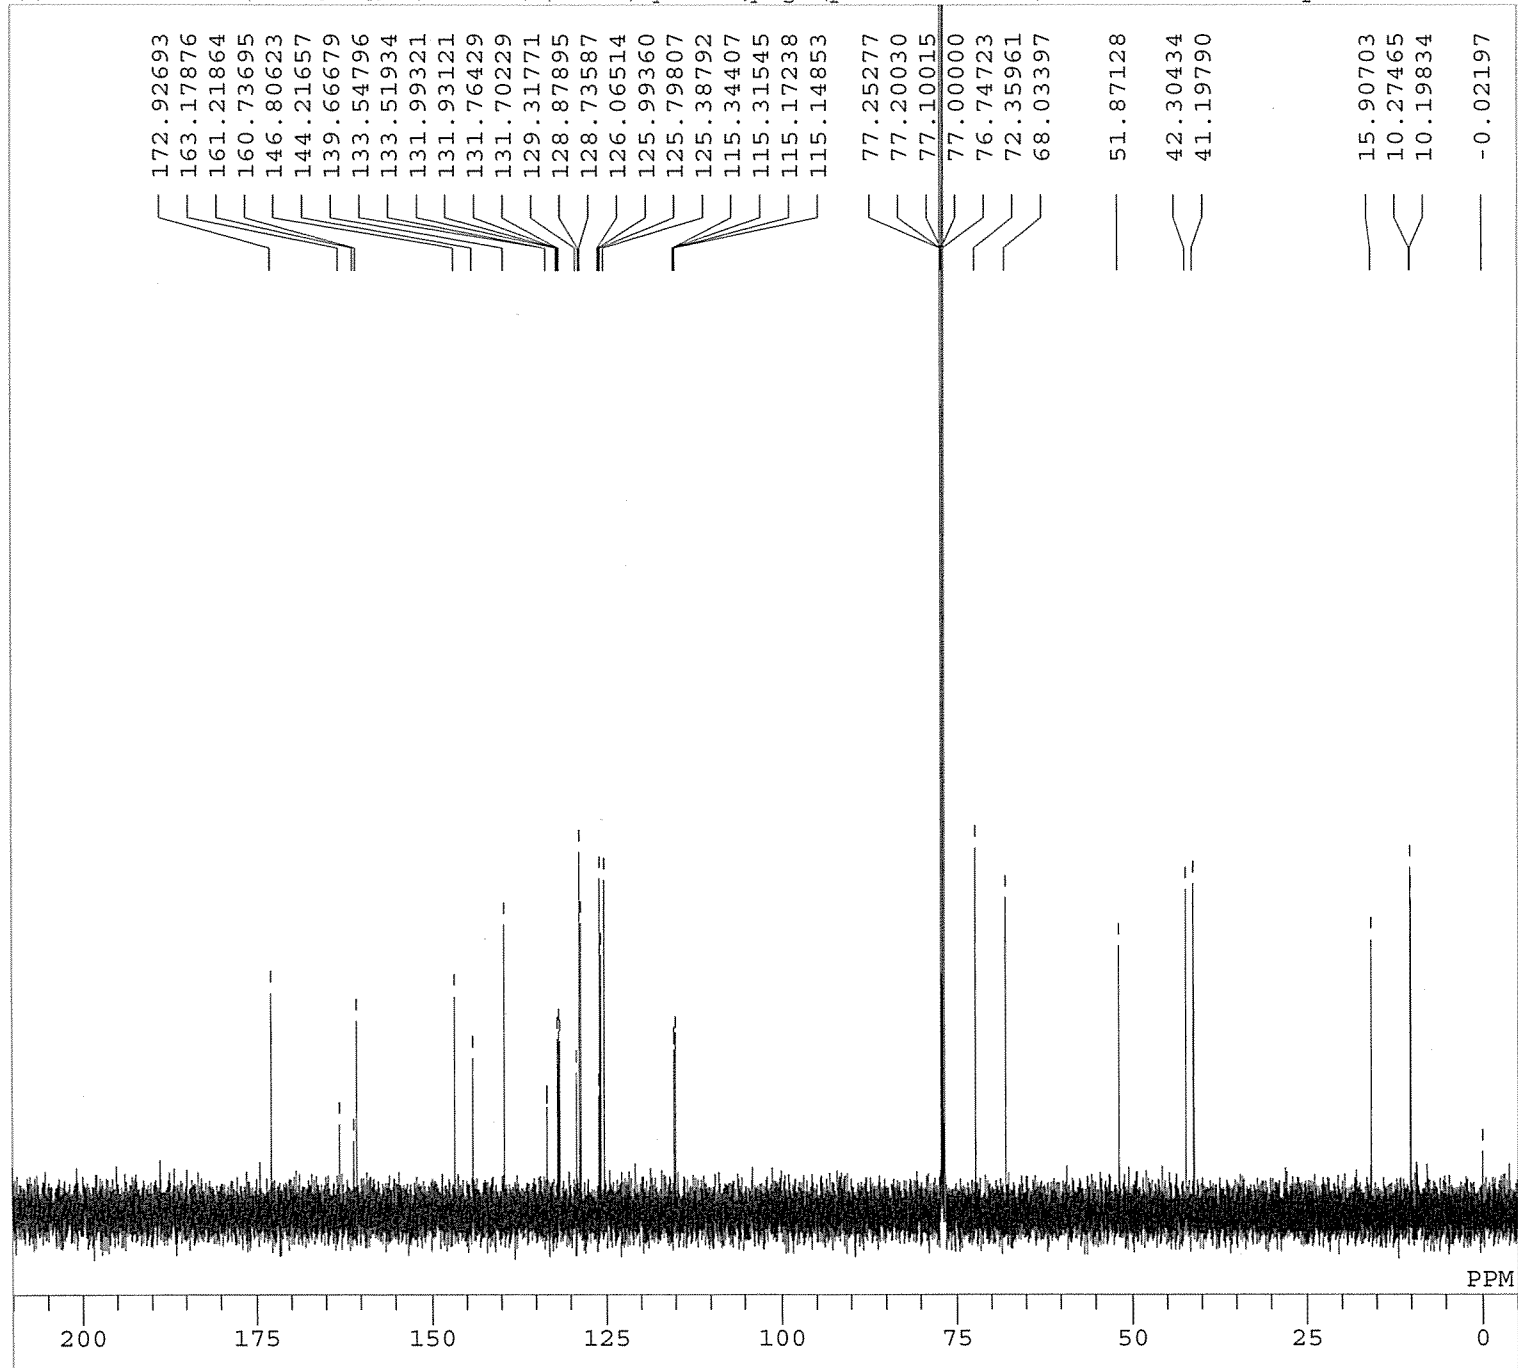

DFILE Pitavastatin-Comp25-C13-1  
 COMNT single pulse decoupled ga  
 DATIM 2013-04-05 22:34:02  
 OBNUC 13C  
 EXMOD single\_pulse\_dec  
 OBFRQ 125.77 MHz  
 OBSET 7.87 KHz  
 OBFIN 4.21 Hz  
 POINT 52428  
 FREQU 31446.06 Hz  
 SCANS 1000  
 ACQTM 0.8336 sec  
 PD 2.0000 sec  
 PW1 3.73 usec  
 IRNUC 1H  
 CTEMP 25.3 c  
 SLVNT CDCL3  
 EXREF 77.00 ppm  
 BF 0.12 Hz  
 RGAIN 56

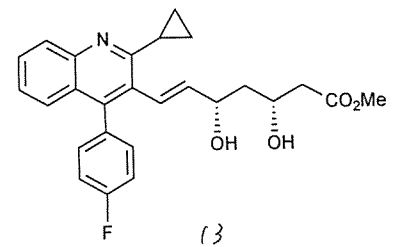

\\10.242.96.55\< 日-Lff[f^(nmr400)\data\byotai\yagi\pitavastatin\Pitavastatin-1.als

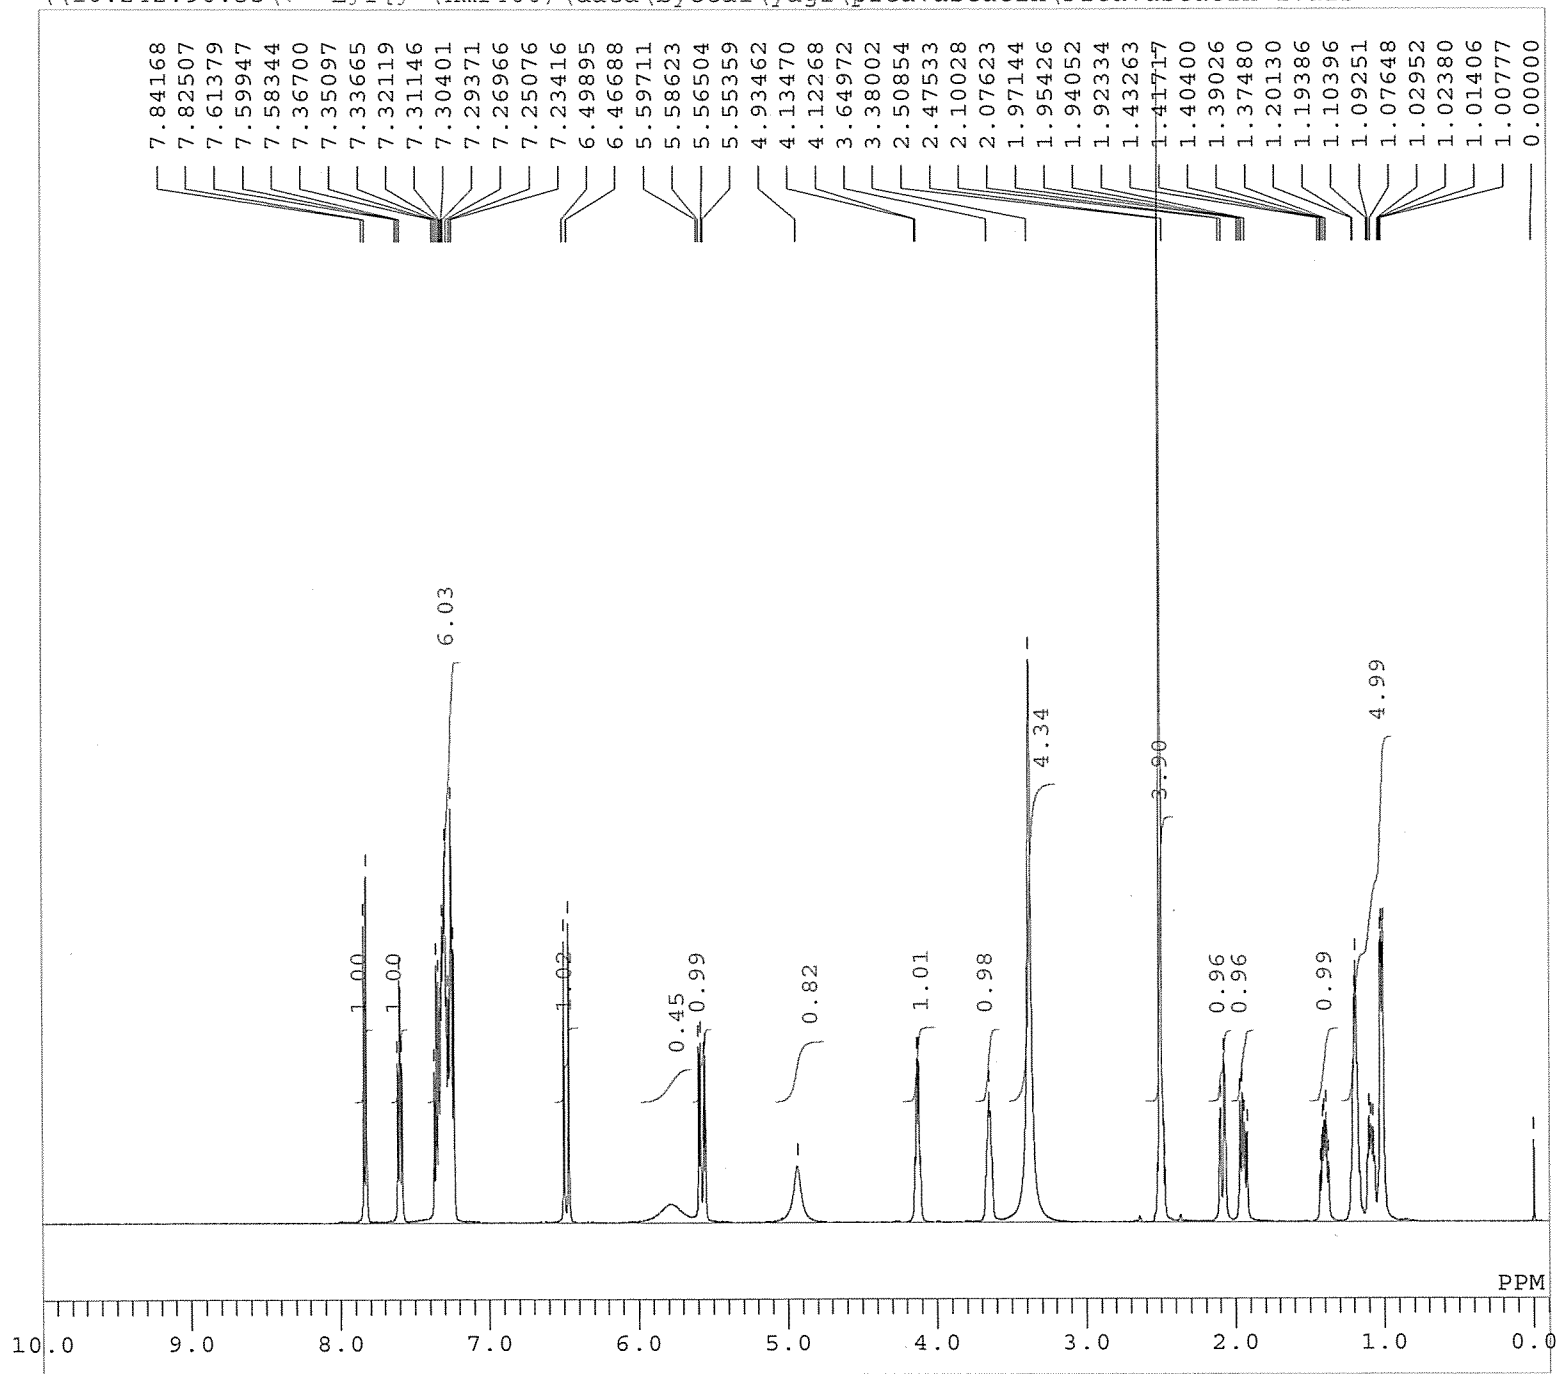

DFILE Pitavastatin-1.als  
 COMNT single\_pulse  
 DATIM 2014-03-04 17:12:56  
 OBNUC 1H  
 EXMOD single\_pulse.ex2  
 OBFRQ 500.16 MHz  
 OBSET 2.41 KHz  
 OBFIN 6.01 Hz  
 POINT 26214  
 FREQU 7507.39 Hz  
 SCANS 16  
 ACQTM 1.7459 sec  
 PD 5.0000 sec  
 PW1 6.50 usec  
 IRNUC 1H  
 CTEMP 20.6 c  
 SLVNT DMSO  
 EXREF 0.00 ppm  
 BF 0.12 Hz  
 RGAIN 40

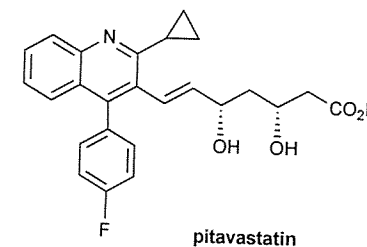

pitavastatin

\\10.242.96.55\< ¼-Lff[f^(nmr400)\data\byotai\yagi\pitavastatin\Pitavastatin-C13-1.als

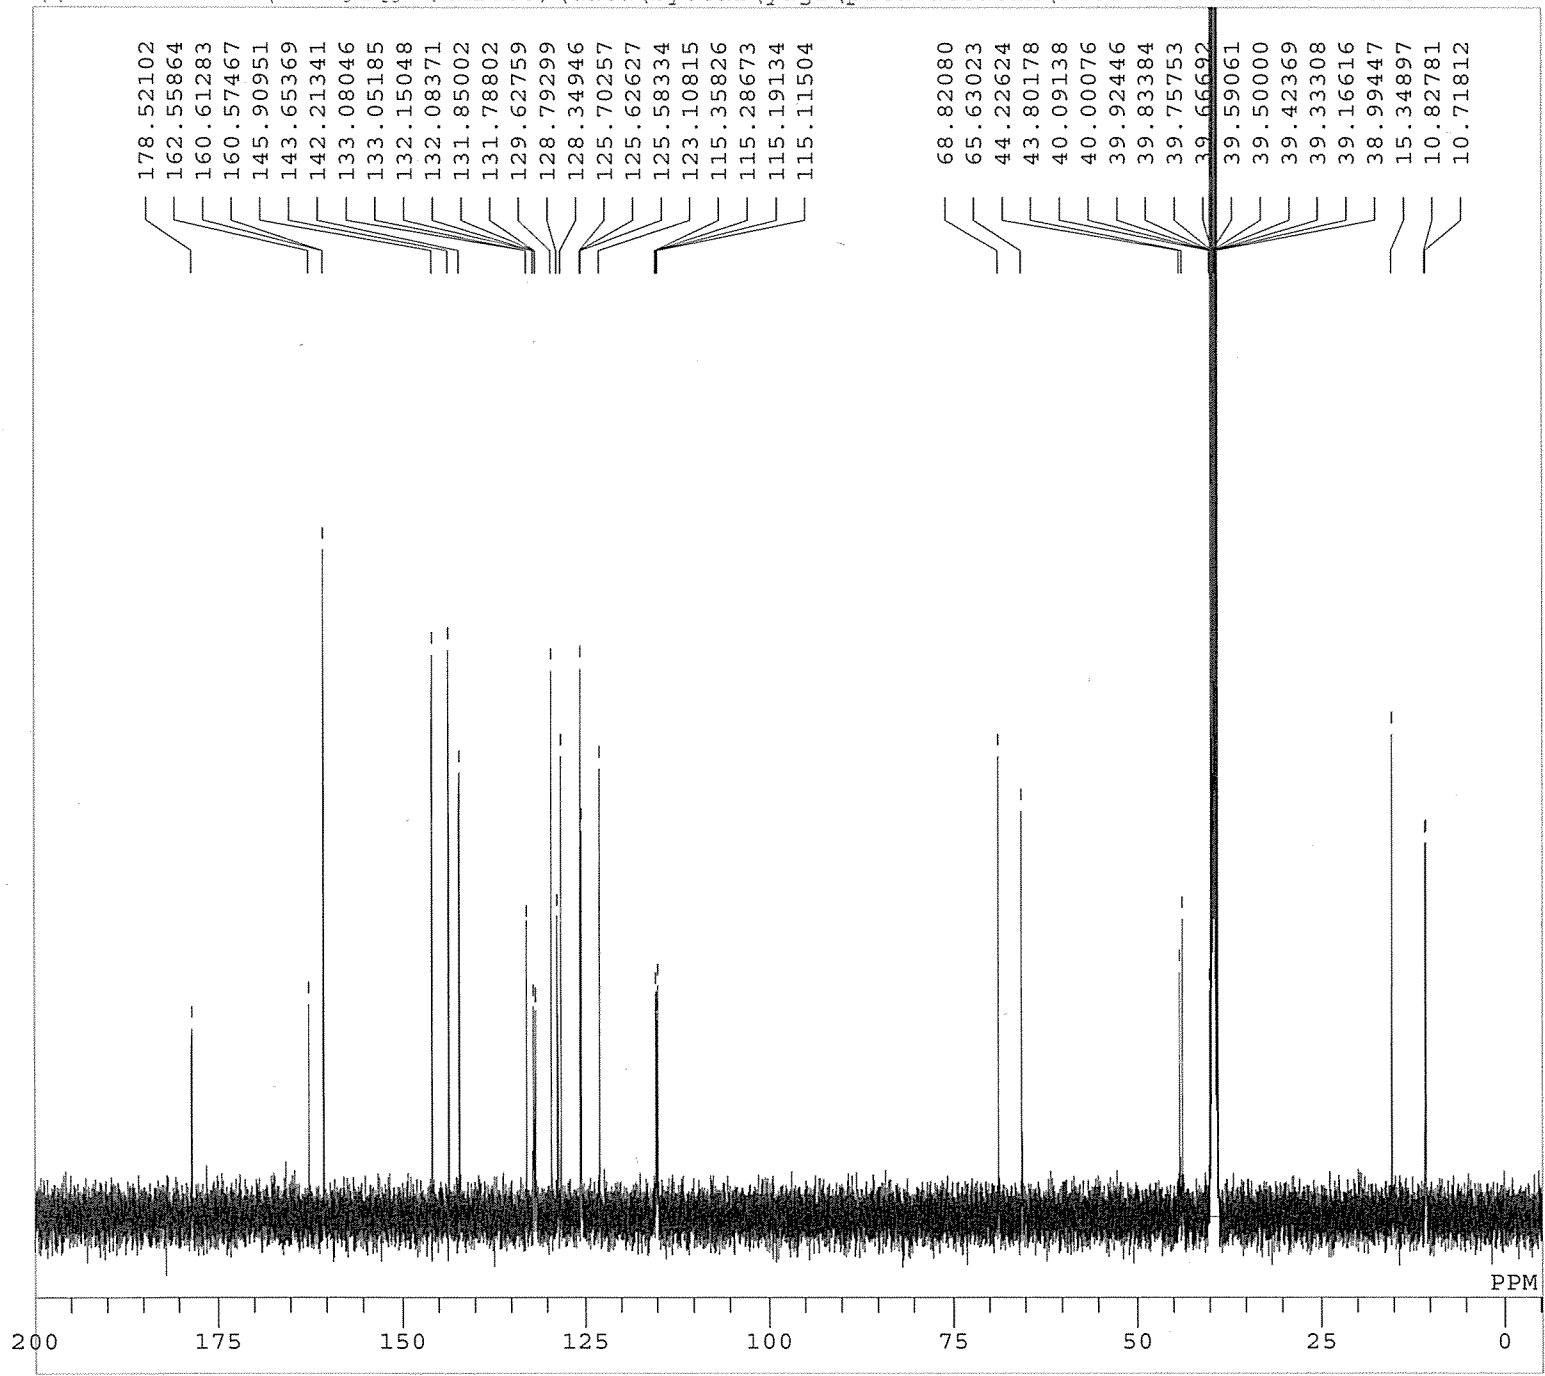

DFILE Pitavastatin-C13-1.als  
 COMNT single pulse decoupled ga  
 DATIM 2014-03-04 18:39:39  
 OBNUC 13C  
 EXMOD single\_pulse\_dec  
 OBFRQ 125.77 MHz  
 OBSET 7.87 KHz  
 OBFIN 4.21 Hz  
 POINT 52428  
 FREQU 31446.06 Hz  
 SCANS 1819  
 ACQTM 0.8336 sec  
 PD 2.0000 sec  
 PW1 3.73 usec  
 IRNUC 1H  
 CTEMP 21.0 c  
 SLVNT DMSO  
 EXREF 39.50 ppm  
 BF 0.12 Hz  
 RGAIN 54

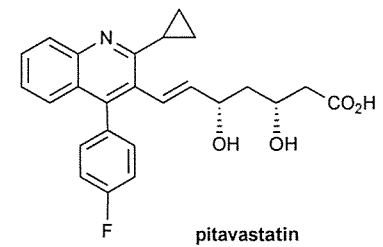

Supplement: c4ob01953a1.pdf [file c4ob01953a1.pdf]
